# Supplementary material for: Perturbation of Quorum Sensing after the Acquisition of Bacteriophage Resistance Could Contribute to Novel Traits in Vibrio alginolyticus
Source: MDPI journal article supplement (doi:10.3390/microorganisms11092273), 2023-09-10
Supplement: s1 [file s1]

**Skliros et al., 2023. Table S2.** Average relative transcript abundances ( $\pm$ SE) of *Vibrio alginolyticus* strain V1 genes and its respective resistant strains to bacteriophages  $\phi$ St2 (VaphiSt2) and Athena1 (VaAthena1). **A** for QS cassette genes, **B** for genes regulated by QS cascade. Heat maps that appear in Figure 3 of main text correspond to the presented colored values here. *P* value represents t-tests between Wild type and respective resistant strain. All treatments passed normality t-test. If equal variance test failed a Welch's test was applied. Statistical significance ( $P \leq 0.05$ ) is represented by bold *P* value.

**A.**

| Relative expression levels of QS cassette genes |             |          |              |              |          |              |              |          |              |              |          |              |             |          |              |
|-------------------------------------------------|-------------|----------|--------------|--------------|----------|--------------|--------------|----------|--------------|--------------|----------|--------------|-------------|----------|--------------|
|                                                 | <i>LuxQ</i> | $\pm$ SE | <i>P</i>     | <i>LuxM</i>  | $\pm$ SE | <i>P</i>     | <i>Hfq</i>   | $\pm$ SE | <i>P</i>     | <i>LuxU</i>  | $\pm$ SE | <i>P</i>     | <i>aphA</i> | $\pm$ SE | <i>P</i>     |
| Wild type                                       | 0.072       | 0.014    | na           | 0.120        | 0.003    | na           | 1.048        | 0.080    | na           | 0.289        | 0.011    | na           | 3.633       | 0.039    | na           |
| VaphiSt2                                        | 0.059       | 0.003    | 0.509        | 0.057        | 0.010    | <b>0.007</b> | 0.746        | 0.154    | 0.230        | 0.024        | 0.005    | <b>0.000</b> | 1.618       | 0.116    | <b>0.002</b> |
| VaAthena1                                       | 0.015       | 0.000    | 0.077        | 0.046        | 0.011    | <b>0.006</b> | 0.407        | 0.108    | <b>0.018</b> | 0.006        | 0.001    | <b>0.000</b> | 0.306       | 0.015    | <b>0.000</b> |
|                                                 | <i>LuxP</i> | $\pm$ SE | <i>P</i>     | <i>CqsA1</i> | $\pm$ SE | <i>P</i>     | <i>LuxO1</i> | $\pm$ SE | <i>P</i>     | <i>LuxO2</i> | $\pm$ SE | <i>P</i>     | <i>LuxN</i> | $\pm$ SE | <i>P</i>     |
| Wild type                                       | 0.438       | 0.005    | na           | 0.371        | 0.164    | na           | 0.016        | 0.001    | na           | 0.067        | 0.008    | na           | 1.284       | 0.131    | na           |
| VaphiSt2                                        | 0.065       | 0.000    | <b>0.034</b> | 0.002        | 0.000    | 0.208        | 0.006        | 0.001    | <b>0.011</b> | 0.012        | 0.000    | <b>0.032</b> | 0.032       | 0.006    | <b>0.016</b> |
| VaAthena1                                       | 0.088       | 0.001    | <b>0.038</b> | 0.004        | 0.000    | 0.209        | 0.051        | 0.007    | <b>0.050</b> | 0.006        | 0.001    | <b>0.024</b> | 0.016       | 0.003    | <b>0.016</b> |
|                                                 | <i>LuxR</i> | $\pm$ SE | <i>P</i>     | <i>LuxS</i>  | $\pm$ SE | <i>P</i>     | <i>CqsA2</i> | $\pm$ SE | <i>P</i>     | <i>CqsS</i>  | $\pm$ SE | <i>P</i>     |             |          |              |
| Wild type                                       | 1.233       | 0.135    | na           | 0.753        | 0.108    | na           | 0.036        | 0.001    | na           | 0.112        | 0.006    | na           |             |          |              |
| VaphiSt2                                        | 0.045       | 0.009    | <b>0.018</b> | 0.269        | 0.003    | <b>0.021</b> | 0.031        | 0.002    | 0.262        | 0.117        | 0.008    | 0.694        |             |          |              |
| VaAthena1                                       | 0.008       | 0.004    | <b>0.018</b> | 0.579        | 0.057    | 0.308        | 0.016        | 0.002    | <b>0.002</b> | 0.027        | 0.005    | <b>0.000</b> |             |          |              |

B.

| Relative expression levels of QS cascade regulated genes |             |          |              |            |          |              |                 |          |              |
|----------------------------------------------------------|-------------|----------|--------------|------------|----------|--------------|-----------------|----------|--------------|
|                                                          | <i>Uhpc</i> | $\pm$ SE | <i>P</i>     | <i>trh</i> | $\pm$ SE | <i>P</i>     | <i>trpE</i>     | $\pm$ SE | <i>P</i>     |
| Wild type                                                | 0.117       | 0.050    | na           | 0.194      | 0.047    | na           | 0.116           | 0.010    | na           |
| VaphiSt2                                                 | 0.004       | 0.000    | <b>0.04</b>  | 0.052      | 0.006    | 0.102        | 0.034           | 0.015    | <b>0.050</b> |
| VaAthena1                                                | 0.002       | 0.000    | <b>0.03</b>  | 0.031      | 0.005    | 0.127        | 0.059           | 0.014    | <b>0.023</b> |
|                                                          | <i>fur</i>  | $\pm$ SE | <i>P</i>     | <i>Wza</i> | $\pm$ SE | <i>P</i>     | <i>Bcr/Cfla</i> | $\pm$ SE | <i>P</i>     |
| Wild type                                                | 0.783       | 0.030    | na           | 0.023      | 0.001    | na           | 4.270           | 1.057    | na           |
| VaphiSt2                                                 | 0.642       | 0.017    | <b>0.040</b> | 0.001      | 0.000    | <b>0.006</b> | 0.059           | 0.004    | <b>0.031</b> |
| VaAthena1                                                | 0.245       | 0.042    | <b>0.002</b> | 0.000      | 0.000    | <b>0.005</b> | 0.020           | 0.009    | <b>0.030</b> |
