# Supplementary material for: Perturbation of Quorum Sensing after the Acquisition of Bacteriophage Resistance Could Contribute to Novel Traits in Vibrio alginolyticus
Source: MDPI journal article supplement (doi:10.3390/microorganisms11092273), 2023-09-10
Supplement: s1 [file s1]

**Skliros et al., 2023. Table S1.** Primers list with average reaction efficiency (E) taken from slopes and  $r^2$  of rt-qPCR platform. Primers list, which were used to study relative transcript levels of *Vibrio alginolyticus* strain V1 genes involved in QS (A) and QS regulated genes (B).

**A.**

| Primers amplifying genes of QS cassette |                                     | Average Reaction Efficiency | $r^2$ |
|-----------------------------------------|-------------------------------------|-----------------------------|-------|
| Gene                                    | Primers (R'/F')                     |                             |       |
| <i>LuxQ</i>                             | Reverse-5'-TGGCGTGCCTAGTTTTAGCT-3'  | 1.976                       | 0.999 |
|                                         | Forward-5'-CCAACTTCCGCATCTTGGTG -3' |                             |       |
| <i>LuxP</i>                             | Reverse-5'-CAACGGCCAATTCACGACTT -3' | 1.979                       | 0.999 |
|                                         | Forward-5'-TGGGAACATCATCAGCCGTT -3' |                             |       |
| <i>LuxM</i>                             | Reverse-5'-GTTGATGCCAGCTTTGCACT -3' | 1.985                       | 0.999 |
|                                         | Forward-5'-GCCCTCTTGCTCAAATCGTC -3' |                             |       |
| <i>CqsA1</i>                            | Reverse-5'-CACGTAGAGGAGCGATGGTC-3'  | 1.995                       | 0.999 |
|                                         | Forward-5'-CGTCACGGTTCAGGGATCAT-3'  |                             |       |
| <i>CqsA2</i>                            | Reverse-5'-TGTTTCCTTCCAGTTGCAGGG-3' | 1.985                       | 0.999 |
|                                         | Forward-5'-GTCCGCGACTTTCTCGAAGA-3'  |                             |       |
| <i>Hfq</i>                              | Reverse-5'-TCACCTTGTGGACGTTACCC -3' | 1.954                       | 0.999 |
|                                         | Forward-5'-AGCACGCGATCTCAACAGTT -3' |                             |       |
| <i>LuxO1</i>                            | Reverse-5'-ATCCGTGATAGTTGTGGCGA-3'  | 1.978                       | 0.999 |
|                                         | Forward-5'-AAACGCGCCAAATTGGAAGA-3'  |                             |       |
| <i>LuxO2</i>                            | Reverse-5'-CGACGGACTGACATCAAGGT-3'  | 1.990                       | 0.999 |
|                                         | Forward-5'- CGAGCAAGCGATTGAAGCAT-3' |                             |       |
| <i>LuxS</i>                             | Reverse-5'-ACCGAAACACCAGCATCCAA-3'  | 1.996                       | 0.999 |
|                                         | Forward-5'- CGGCAGCAATGCACTCTTTA-3' |                             |       |
| <i>LuxU</i>                             | Reverse-5'-TGGACATCGCCAGTTCACAA-3'  | 1.993                       | 0.999 |
|                                         | Forward-5'- ATCAGCCACGCGTTGAAAAG-3' |                             |       |
| <i>CqsS</i>                             | Reverse-5'-CACGTAGAGGAGCGATGGTC-3'  | 1.980                       | 0.999 |
|                                         | Forward-5'-CGTCACGGTTCAGGGATCAT-3'  |                             |       |
| <i>aphA</i>                             | Reverse- 5'-ACCACTCTCCTAAAGCGCTG-3' | 1.986                       | 0.999 |
|                                         | Forward-5'-CAAGAAGGCAAACCAGACCG-3'  |                             |       |
| <i>LuxR</i>                             | Reverse-5'- TGTGAAGCACTCCACTCGA -3' | 1.991                       | 0.999 |
|                                         | Forward-5'- TGCGATGATCGAGCTTGTC -3' |                             |       |
| <i>LuxN</i>                             | Reverse-5'AAAATGCCACCAACAGAGCC-3'   | 1.996                       | 0.999 |
|                                         | Forward-5'TTTGGATAAGCAGCAACGCC-3'   |                             |       |

B.

| Primers amplifying genes of QS regulated genes |                                        | Reaction Efficiency | R2    |
|------------------------------------------------|----------------------------------------|---------------------|-------|
| Gene                                           | Primers (R'/F')                        |                     |       |
| <i>UhpC</i>                                    | Reverse-5'-CCGCAACCAATGAACCAACA-3'     | 1.991               | 0.999 |
|                                                | Forward-5'-AGCCTGATTAATGCCAACGC -3'    |                     |       |
| <i>trh</i>                                     | Reverse-5'-TTACCTGCGGTAAAGCCAGG-3'     | 1.989               | 0.999 |
|                                                | Forward-5'-CGCAAAACTTCCGCCAAAAC-3'     |                     |       |
| <i>trpE</i>                                    | Reverse-5'-CTAGCGAGTGGTAACGTGCA-3'     | 1.975               | 0.999 |
|                                                | Forward-5'-GAGCACCAAAACCATGCGAT-3'     |                     |       |
| <i>Bcr/Cfla</i>                                | Reverse-5'- 5'-GCTCGTCTGGTACTAGCGTT-3' | 1.996               | 0.999 |
|                                                | Forward-5'-TCGGGGATTGCCAAAGATCT -3'    |                     |       |
| <i>fur</i>                                     | Reverse-5'-GTCTGGCTGCTGAAGTACTT-3'     | 1.997               | 0.999 |
|                                                | Forward-5'-GCTGAAGGATGCGGGTTTAA -3'    |                     |       |
| <i>Wza</i>                                     | Reverse-5'-CACCATAGACCTGCACGGAA -3'    | 1.990               | 0.999 |
|                                                | Forward-5'- AACGCTGACTCAAACGAGGA-3'    |                     |       |
