# Supplementary material for: Perturbation of Quorum Sensing after the Acquisition of Bacteriophage Resistance Could Contribute to Novel Traits in Vibrio alginolyticus
Source: MDPI journal article supplement (doi:10.3390/microorganisms11092273), 2023-09-10
Supplement: s1 [file s1]

**Skliros et al., 2023. Supplemental Table S3.** Single Nucleotide Polymorphisms of resistant strain **VaAthena1\_A** for each Contig separately. Tables show Nucleotide shift, position, change, polymorphism, type, variant frequency and in the case of a mutation in a CDS product, protein, effect and protein\_id.

Contig 2

| Name | Position | Length | Change | Polymorphism Type  | Variant Frequency | Amino Acid Change | CDS                      | product              | Protein Effect | protein_id |
|------|----------|--------|--------|--------------------|-------------------|-------------------|--------------------------|----------------------|----------------|------------|
| A    | 152043   | 1      | C -> A | SNP (transversion) | 40.00%            | K -> N            | diguanylate cyclase CDS  | diguanylate cyclase  | Substitution   | KLI73954.1 |
| T    | 222636   | 1      | G -> T | SNP (transversion) | 28.60%            | G -> V            | hypothetical protein CDS | hypothetical protein | Substitution   | KLI74018.1 |

Contig 5

| Name | Minimum | Maximum | Length | Change   | Coverage   | Polymorphism Type  | Variant Frequency |
|------|---------|---------|--------|----------|------------|--------------------|-------------------|
| G    | 22      | 22      | 1      | T -> G   | 91         | SNP (transversion) | 38.50%            |
| A    | 35      | 35      | 1      | G -> A   | 68         | SNP (transition)   | 32.40%            |
| GA   | 37      | 38      | 2      | TT -> GA | 51 -> 67   | Substitution       | 29.9% -> 31.4%    |
| T    | 53      | 53      | 1      | C -> T   | 32         | SNP (transition)   | 31.30%            |
| G    | 272000  | 272000  | 1      | A -> G   | 220        | SNP (transition)   | 25.00%            |
| C    | 272002  | 272002  | 1      | T -> C   | 220        | SNP (transition)   | 25.50%            |
| C    | 272005  | 272005  | 1      | G -> C   | 225        | SNP (transversion) | 26.20%            |
| A    | 272009  | 272009  | 1      | T -> A   | 232        | SNP (transversion) | 27.20%            |
| AAG  | 272013  | 272012  | 0      |          | 236        | Insertion          | 25.00%            |
| TT   | 272016  | 272017  | 2      | AA -> TT | 246 -> 247 | Substitution       | 27.5% -> 27.6%    |
| A    | 272019  | 272019  | 1      | G -> A   | 252        | SNP (transition)   | 28.20%            |
| G    | 272023  | 272023  | 1      | A -> G   | 262        | SNP (transition)   | 28.20%            |
| G    | 272025  | 272025  | 1      | C -> G   | 263        | SNP (transversion) | 30.00%            |
| C    | 272027  | 272027  | 1      | G -> C   | 264        | SNP (transversion) | 30.70%            |
| CG   | 272032  | 272031  | 0      |          | 261        | Insertion          | 30.70%            |
| G    | 272035  | 272035  | 1      | C -> G   | 266        | SNP (transversion) | 30.80%            |
| C    | 272037  | 272037  | 1      | G -> C   | 267        | SNP (transversion) | 30.70%            |

## Contig 6

| Name                                                                                              | Minimum | Maximum | Length | Change                                                                                                                    | Coverage   | Polymorphism Type  | Variant Frequency |
|---------------------------------------------------------------------------------------------------|---------|---------|--------|---------------------------------------------------------------------------------------------------------------------------|------------|--------------------|-------------------|
| AT                                                                                                | 49      | 50      | 2      | TC -> AT                                                                                                                  | 194 -> 195 | Substitution       | 34.9% -> 35.1%    |
| T                                                                                                 | 52      | 52      | 1      | C -> T                                                                                                                    | 202        | SNP (transition)   | 34.70%            |
| T                                                                                                 | 64      | 64      | 1      | A -> T                                                                                                                    | 223        | SNP (transversion) | 41.30%            |
| T                                                                                                 | 152     | 151     | 0      |                                                                                                                           | 223        | Insertion          | 55.60%            |
| G                                                                                                 | 155     | 155     | 1      | A -> G                                                                                                                    | 223        | SNP (transition)   | 56.50%            |
| TCA                                                                                               | 157     | 159     | 3      | ATT -> TCA                                                                                                                | 213 -> 223 | Substitution       | 56.1% -> 58.7%    |
| GT                                                                                                | 162     | 163     | 2      | TC -> GT                                                                                                                  | 227 -> 228 | Substitution       | 55.3% -> 55.5%    |
| TTAAAATGGCTACGTAGCTCAG<br>CTGGTTAGAGCACATCACTCAT<br>AATGATGGGGTCACAGGTTCGA<br>ATCCCGTCGTAGCCACCAT | 165     | 165     | 1      | A -><br>TTAAAATGGCTA<br>CGTAGCTCAGCT<br>GGTTAGAGCAC<br>ATCACTCATAAT<br>GATGGGGTCAC<br>AGGTTCGAATCC<br>CGTCGTAGCCAC<br>CAT | 164 -> 230 | Insertion          | 34.1% -> 51.3%    |
| A                                                                                                 | 166     | 165     | 0      |                                                                                                                           | 161        | Insertion          | 35.40%            |
| TT                                                                                                | 166     | 165     | 0      |                                                                                                                           | 149 -> 151 | Insertion          | 30.2% -> 31.1%    |
| T                                                                                                 | 166     | 165     | 0      |                                                                                                                           | 148        | Insertion          | 29.70%            |
| T                                                                                                 | 300     | 300     | 1      | G -> T                                                                                                                    | 139        | SNP (transversion) | 32.40%            |
| AA                                                                                                | 310     | 311     | 2      | CC -> AA                                                                                                                  | 173 -> 222 | Substitution       | 42.2% -> 56.3%    |
| T                                                                                                 | 390     | 390     | 1      | C -> T                                                                                                                    | 277        | SNP (transition)   | 44.80%            |
| C                                                                                                 | 420     | 420     | 1      | T -> C                                                                                                                    | 369        | SNP (transition)   | 36.60%            |
| A                                                                                                 | 428     | 428     | 1      | T -> A                                                                                                                    | 410        | SNP (transversion) | 36.60%            |
| A                                                                                                 | 436     | 436     | 1      | T -> A                                                                                                                    | 486        | SNP (transversion) | 47.30%            |
| C                                                                                                 | 437     | 437     | 1      | T -> C                                                                                                                    | 487        | SNP (transition)   | 37.80%            |
| G                                                                                                 | 191752  | 191752  | 1      | A -> G                                                                                                                    | 296        | SNP (transition)   | 28.00%            |

## Contig 7

| Name | Minimum | Maximum | Length | Change | Coverage | Polymorphism Type  | Variant Frequency | Amino Acid Change | CDS                         | product                 | Protein Effect | protein_id |
|------|---------|---------|--------|--------|----------|--------------------|-------------------|-------------------|-----------------------------|-------------------------|----------------|------------|
| C    | 216879  | 216879  | 1      | T -> C | 250      | SNP (transition)   | 30.80%            |                   | calcium-binding protein CDS | calcium-binding protein | None           | KLI72868.1 |
| C    | 216885  | 216885  | 1      | A -> C | 252      | SNP (transversion) | 31.00%            |                   | calcium-binding protein CDS | calcium-binding protein | None           | KLI72868.1 |
| C    | 216888  | 216888  | 1      | G -> C | 254      | SNP (transversion) | 30.70%            |                   | calcium-binding protein CDS | calcium-binding protein | None           | KLI72868.1 |
| T    | 216921  | 216921  | 1      | C -> T | 266      | SNP (transition)   | 30.80%            |                   | calcium-binding protein CDS | calcium-binding protein | None           | KLI72868.1 |
| T    | 216924  | 216924  | 1      | C -> T | 262      | SNP (transition)   | 30.50%            |                   | calcium-binding protein CDS | calcium-binding protein | None           | KLI72868.1 |
| C    | 216927  | 216927  | 1      | G -> C | 261      | SNP (transversion) | 29.90%            |                   | calcium-binding protein CDS | calcium-binding protein | None           | KLI72868.1 |
| A    | 216942  | 216942  | 1      | T -> A | 254      | SNP (transversion) | 27.20%            |                   | calcium-binding protein CDS | calcium-binding protein | None           | KLI72868.1 |

## Contig 13

| Name | Minimum | Maximum | Length | Change | Coverage | Polymorphism Type | Variant Frequency |
|------|---------|---------|--------|--------|----------|-------------------|-------------------|
| A    | 286321  | 286321  | 1      | G -> A | 290      | SNP (transition)  | 27.90%            |

## Contig 14

| Name | Minimum | Maximum | Length | Change       | Coverage     | Polymorphism Type  | Variant Frequency | Variant P-Value (approximate) | Amino Acid Change | CDS                      | product              | Protein Effect | protein_id  |
|------|---------|---------|--------|--------------|--------------|--------------------|-------------------|-------------------------------|-------------------|--------------------------|----------------------|----------------|-------------|
| G    | 31      | 31      | 1      | A -> G       | 1638         | SNP (transition)   | 78.80%            | 0                             |                   | hypothetical protein CDS | hypothetical protein | None           | KLI717 69.1 |
| A    | 34      | 34      | 1      | G -> A       | 1654         | SNP (transition)   | 78.90%            | 0                             |                   | hypothetical protein CDS | hypothetical protein | None           | KLI717 69.1 |
| C    | 61      | 61      | 1      | G -> C       | 1722         | SNP (transversion) | 56.20%            | 0                             |                   | hypothetical protein CDS | hypothetical protein | None           | KLI717 69.1 |
| A    | 66      | 66      | 1      | G -> A       | 1675         | SNP (transition)   | 63.50%            | 0                             |                   | hypothetical protein CDS | hypothetical protein | None           | KLI717 69.1 |
| C    | 67      | 67      | 1      | T -> C       | 1668         | SNP (transition)   | 56.70%            | 0                             |                   | hypothetical protein CDS | hypothetical protein | None           | KLI717 69.1 |
| G    | 73      | 73      | 1      | A -> G       | 1662         | SNP (transition)   | 56.90%            | 0                             |                   | hypothetical protein CDS | hypothetical protein | None           | KLI717 69.1 |
| C    | 120     | 120     | 1      | T -> C       | 540          | SNP (transition)   | 52.00%            | 0                             | K -> E            | hypothetical protein CDS | hypothetical protein | Substitution   | KLI717 69.1 |
| A    | 7       | 7       | 1      | G -> A       | 1807         | SNP (transition)   | 40.20%            | 0                             |                   | hypothetical protein CDS | hypothetical protein | None           | KLI717 69.1 |
| AATC | 10      | 13      | 3      | CACG -> AATC | 1727 -> 1796 | Substitution       | 35.0% -> 35.7%    | 0                             | TV -> TI          | hypothetical protein CDS | hypothetical protein | Substitution   | KLI717 69.1 |
| G    | 22      | 22      | 1      | A -> G       | 1688         | SNP (transition)   | 38.70%            | 0                             |                   | hypothetical protein CDS | hypothetical protein | None           | KLI717 69.1 |
| G    | 31      | 31      | 1      | A -> G       | 1638         | SNP (transition)   | 78.80%            | 0                             |                   | hypothetical protein CDS | hypothetical protein | None           | KLI717 69.1 |
| A    | 34      | 34      | 1      | G -> A       | 1654         | SNP (transition)   | 78.90%            | 0                             |                   | hypothetical protein CDS | hypothetical protein | None           | KLI717 69.1 |
| T    | 52      | 52      | 1      | C -> T       | 1677         | SNP (transition)   | 34.80%            | 0                             |                   | hypothetical protein CDS | hypothetical protein | None           | KLI717 69.1 |
| C    | 55      | 55      | 1      | T -> C       | 1699         | SNP (transition)   | 33.30%            | 0                             |                   | hypothetical protein CDS | hypothetical protein | None           | KLI717 69.1 |
| C    | 61      | 61      | 1      | G -> C       | 1722         | SNP (transversion) | 56.20%            | 0                             |                   | hypothetical protein CDS | hypothetical protein | None           | KLI717 69.1 |
| A    | 66      | 66      | 1      | G -> A       | 1675         | SNP (transition)   | 63.50%            | 0                             |                   | hypothetical protein CDS | hypothetical protein | None           | KLI717 69.1 |
| C    | 67      | 67      | 1      | T -> C       | 1668         | SNP (transition)   | 56.70%            | 0                             |                   | hypothetical protein CDS | hypothetical protein | None           | KLI717 69.1 |
| G    | 73      | 73      | 1      | A -> G       | 1662         | SNP (transition)   | 56.90%            | 0                             |                   | hypothetical protein CDS | hypothetical protein | None           | KLI717 69.1 |

|   |     |     |   |        |     |                     |        |   |        |                             |                         |                  |                |
|---|-----|-----|---|--------|-----|---------------------|--------|---|--------|-----------------------------|-------------------------|------------------|----------------|
| C | 120 | 120 | 1 | T -> C | 540 | SNP<br>(transition) | 52.00% | 0 | K -> E | hypothetical protein<br>CDS | hypothetical<br>protein | Substitut<br>ion | KLI717<br>69.1 |
| C | 175 | 175 | 1 | T -> C | 389 | SNP<br>(transition) | 44.20% | 0 |        | hypothetical protein<br>CDS | hypothetical<br>protein | None             | KLI717<br>69.1 |

Contig 15

| Name                   | Minimum | Maximum | Length | Change                                              | Coverage      | Polymorphism<br>Type  | Variant<br>Frequency |
|------------------------|---------|---------|--------|-----------------------------------------------------|---------------|-----------------------|----------------------|
| C                      | 1       | 1       | 1      | A -> C                                              | 169           | SNP<br>(transversion) | 96.40%               |
| ATATCAG                | 4       | 10      | 7      | CATATCA -> ATATCAG                                  | 169 -><br>182 | Substitution          | 87.4% -><br>94.1%    |
| ACG                    | 12      | 14      | 3      | GAC -> ACG                                          | 183           | Substitution          | 87.40%               |
| TCAG                   | 17      | 20      | 4      | GTCA -> TCAG                                        | 186 -><br>190 | Substitution          | 83.7% -><br>85.5%    |
| TA                     | 22      | 23      | 2      | GT -> TA                                            | 193           | Substitution          | 81.3% -><br>82.4%    |
| CATCACTGCTCGCTCTGTCTAT | 26      | 47      | 22     | ACATCACTGCTCGCTCTGTCTA -><br>CATCACTGCTCGCTCTGTCTAT | 191 -><br>206 | Substitution          | 70.4% -><br>80.3%    |
| CT                     | 49      | 50      | 2      | TC -> CT                                            | 201 -><br>203 | Substitution          | 69.7% -><br>70.9%    |
| GTCTCATA               | 52      | 59      | 8      | TGTCTCAT -> GTCTCATA                                | 191 -><br>198 | Substitution          | 63.6% -><br>68.2%    |
| C                      | 62      | 62      | 1      | A -> C                                              | 197           | SNP<br>(transversion) | 62.90%               |
| GCTGA                  | 64      | 68      | 5      | CGCTG -> GCTGA                                      | 199 -><br>203 | Substitution          | 59.1% -><br>60.8%    |
| CACAT                  | 70      | 74      | 5      | ACACA -> CACAT                                      | 198 -><br>201 | Substitution          | 55.3% -><br>58.7%    |
| GA                     | 76      | 77      | 2      | TG -> GA                                            | 205           | Substitution          | 53.20%               |
| G                      | 80      | 80      | 1      | A -> G                                              | 205           | SNP<br>(transition)   | 53.20%               |
| C                      | 82      | 82      | 1      | G -> C                                              | 204           | SNP<br>(transversion) | 52.00%               |
| ATATA                  | 84      | 88      | 5      | CATAT -> ATATA                                      | 198 -><br>205 | Substitution          | 48.8% -><br>50.5%    |
| CG                     | 92      | 93      | 2      | AC -> CG                                            | 205           | Substitution          | 47.30%               |
| CTCAGTAC               | 95      | 102     | 8      | GCTCAGTA -> CTCAGTAC                                | 213 -><br>216 | Substitution          | 43.5% -><br>45.1%    |
| A                      | 104     | 104     | 1      | C -> A                                              | 216           | SNP<br>(transversion) | 42.60%               |
| CGT                    | 107     | 109     | 3      | ACG -> CGT                                          | 211 -><br>216 | Substitution          | 39.3% -><br>41.2%    |
| GCACA                  | 111     | 115     | 5      | TGCAC -> GCACA                                      | 213 -><br>214 | Substitution          | 37.9% -><br>38.0%    |

|          |     |     |   |                      |            |                    |                |
|----------|-----|-----|---|----------------------|------------|--------------------|----------------|
| G        | 117 | 117 | 1 | A -> G               | 216        | SNP (transition)   | 38.00%         |
| T        | 119 | 119 | 1 | G -> T               | 221        | SNP (transversion) | 37.10%         |
| CTG      | 121 | 123 | 3 | TCT -> CTG           | 221 -> 222 | Substitution       | 36.2% -> 36.5% |
| TG       | 125 | 126 | 2 | GT -> TG             | 222        | Substitution       | 35.6% -> 36.0% |
| CTGA     | 128 | 131 | 4 | GCTG -> CTGA         | 225 -> 228 | Substitution       | 33.9% -> 35.1% |
| TCTCA    | 133 | 137 | 5 | ATCTC -> TCTCA       | 226 -> 233 | Substitution       | 31.8% -> 33.3% |
| T        | 139 | 139 | 1 | A -> T               | 233        | SNP (transversion) | 31.80%         |
| ACAC     | 141 | 144 | 4 | TACA -> ACAC         | 228 -> 232 | Substitution       | 30.3% -> 31.2% |
| ATCGCACT | 146 | 153 | 8 | CATCGCAC -> ATCGCACT | 221 -> 226 | Substitution       | 24.9% -> 27.6% |

Contig 17

| Name | Minimum | Maximum | Length | Change  | Coverage   | Polymorphism Type  | Variant Frequency |
|------|---------|---------|--------|---------|------------|--------------------|-------------------|
| G    | 22      | 22      | 1      | A -> G  | 153        | SNP (transition)   | 37.30%            |
| A    | 36      | 36      | 1      | G -> A  | 159        | SNP (transition)   | 37.10%            |
| C    | 72      | 73      | 2      | AT -> C | 179 -> 183 | Deletion           | 40.4% -> 41.3%    |
| A    | 216849  | 216848  | 0      |         | 84         | Insertion          | 91.70%            |
| T    | 216850  | 216850  | 1      | A -> T  | 84         | SNP (transversion) | 96.40%            |
|      | 216856  | 216857  | 2      |         | 346 -> 366 | Deletion           | 51.6% -> 54.6%    |
| A    | 216861  | 216861  | 1      | T -> A  | 345        | SNP (transversion) | 35.10%            |
| C    | 216862  | 216862  | 1      | T -> C  | 351        | SNP (transition)   | 53.80%            |
| T    | 216864  | 216864  | 1      | G -> T  | 353        | SNP (transversion) | 62.90%            |
| T    | 216866  | 216866  | 1      | G -> T  | 349        | SNP (transversion) | 55.00%            |
| T    | 216868  | 216868  | 1      | C -> T  | 349        | SNP (transition)   | 53.90%            |
| G    | 216871  | 216871  | 1      | T -> G  | 343        | SNP (transversion) | 61.80%            |
| A    | 216872  | 216872  | 1      | T -> A  | 338        | SNP (transversion) | 54.10%            |
| AA   | 216875  | 216875  | 1      | C -> AA | 333 -> 339 | Insertion          | 49.6% -> 49.8%    |
| T    | 216878  | 216878  | 1      | C -> T  | 332        | SNP (transition)   | 50.90%            |
| G    | 216882  | 216882  | 1      | T -> G  | 317        | SNP (transversion) | 53.30%            |

|   |        |        |   |        |     |                    |        |
|---|--------|--------|---|--------|-----|--------------------|--------|
| C | 216946 | 216946 | 1 | A -> C | 214 | SNP (transversion) | 36.00% |
|   | 216955 | 216955 | 1 |        | 194 | Deletion           | 25.80% |
| A | 216958 | 216958 | 1 | T -> A | 186 | SNP (transversion) | 26.90% |
| G | 217109 | 217109 | 1 | A -> G | 130 | SNP (transition)   | 64.60% |

Contig 19

| Name   | Minimum | Maximum | Length | Change           | Coverage   | Polymorphism Type  | Variant Frequency |
|--------|---------|---------|--------|------------------|------------|--------------------|-------------------|
| TTGTT  | 77      | 81      | 5      | AAAAG -> TTGTT   | 110 -> 112 | Substitution       | 24.5% -> 26.1%    |
| AT     | 83      | 84      | 2      | CC -> AT         | 112 -> 115 | Substitution       | 26.8% -> 28.7%    |
| AATCAA | 86      | 91      | 6      | TCGGGC -> AATCAA | 126 -> 128 | Substitution       | 34.9% -> 35.9%    |
| GT     | 93      | 94      | 2      | AG -> GT         | 128 -> 132 | Substitution       | 34.8% -> 35.9%    |
| GC     | 96      | 97      | 2      | CA -> GC         | 135 -> 136 | Substitution       | 34.6% -> 34.8%    |
| A      | 99      | 99      | 1      | T -> A           | 139        | SNP (transversion) | 34.50%            |
| T      | 197     | 197     | 1      | C -> T           | 148        | SNP (transition)   | 26.40%            |

Contig 22

| Name | Minimum | Maximum | Length | Change | Coverage | Polymorphism Type | Variant Frequency | Variant P-Value (approximate) | Amino Acid Change | CDS                      | product              | Protein Effect | protein_id |
|------|---------|---------|--------|--------|----------|-------------------|-------------------|-------------------------------|-------------------|--------------------------|----------------------|----------------|------------|
| T    | 31636   | 31636   | 1      | C -> T | 163      | SNP (transition)  | 32.50%            | 4.60E-148                     |                   | hypothetical protein CDS | hypothetical protein | None           | KLI70765.1 |

Contig 23

| Name | Minimum | Maximum | Length | Change   | Coverage   | Polymorphism Type | Variant Frequency |
|------|---------|---------|--------|----------|------------|-------------------|-------------------|
| CT   | 2       | 3       | 2      | TA -> CT | 252 -> 253 | Substitution      | 38.1% -> 38.3%    |

|       |     |     |   |                   |            |                    |                |
|-------|-----|-----|---|-------------------|------------|--------------------|----------------|
| T     | 6   | 6   | 1 | G -> T            | 257        | SNP (transversion) | 48.60%         |
| T     | 68  | 68  | 1 | G -> T            | 130        | SNP (transversion) | 31.50%         |
| C     | 70  | 70  | 1 | T -> C            | 130        | SNP (transition)   | 31.50%         |
| GTT   | 72  | 74  | 3 | TGC -> GTT        | 130        | Substitution       | 31.50%         |
| C     | 78  | 78  | 1 | A -> C            | 135        | SNP (transversion) | 40.70%         |
| T     | 79  | 79  | 1 | A -> T            | 135        | SNP (transversion) | 30.40%         |
| T     | 80  | 80  | 1 | G -> T            | 135        | SNP (transversion) | 40.00%         |
| GC    | 82  | 83  | 2 | TT -> GC          | 135        | Substitution       | 29.60%         |
| CAAAA | 85  | 89  | 5 | TCTCT -><br>CAAAA | 135        | Substitution       | 30.40%         |
| GGA   | 92  | 94  | 3 | AAG -> GGA        | 136 -> 138 | Substitution       | 29.0% -> 29.4% |
| C     | 98  | 102 | 5 | AGGTG -> C        | 142 -> 144 | Deletion           | 28.5% -> 28.9% |
| T     | 107 | 107 | 1 | C -> T            | 148        | SNP (transition)   | 36.50%         |
| G     | 114 | 114 | 1 | T -> G            | 142        | SNP (transversion) | 26.10%         |
| A     | 118 | 118 | 1 | G -> A            | 148        | SNP (transition)   | 25.00%         |
| A     | 119 | 119 | 1 | T -> A            | 148        | SNP (transversion) | 33.80%         |
| G     | 120 | 120 | 1 | T -> G            | 148        | SNP (transversion) | 25.00%         |
| T     | 121 | 121 | 1 | G -> T            | 148        | SNP (transversion) | 33.10%         |

Contig 24

| Name | Minimum | Maximum | Length | Change          | Coverage | Polymorphism Type        | Variant Frequency |
|------|---------|---------|--------|-----------------|----------|--------------------------|-------------------|
|      | 195668  | 195668  | 1      | (A)8 -><br>(A)7 | 22       | Deletion (tandem repeat) | 95.50%            |
| T    | 74      | 74      | 1      | C -> T          | 596      | SNP (transition)         | 31.40%            |
| T    | 163     | 163     | 1      | A -> T          | 451      | SNP (transversion)       | 34.10%            |
| T    | 164     | 164     | 1      | A -> T          | 446      | SNP (transversion)       | 39.20%            |
| T    | 168     | 168     | 1      | A -> T          | 410      | SNP (transversion)       | 33.70%            |
| G    | 169     | 169     | 1      | A -> G          | 409      | SNP (transition)         | 47.70%            |
| C    | 170     | 170     | 1      | G -> C          | 404      | SNP (transversion)       | 31.90%            |
| T    | 170     | 170     | 1      | G -> T          | 404      | SNP (transversion)       | 29.50%            |
| G    | 171     | 171     | 1      | A -> G          | 393      | SNP (transition)         | 26.70%            |
| T    | 171     | 171     | 1      | A -> T          | 393      | SNP (transversion)       | 60.60%            |



|   |     |     |   |        |     |                    |        |
|---|-----|-----|---|--------|-----|--------------------|--------|
| C | 172 | 172 | 1 | A -> C | 381 | SNP (transversion) | 27.80% |
| T | 172 | 172 | 1 | A -> T | 381 | SNP (transversion) | 52.20% |
| T | 174 | 174 | 1 | C -> T | 365 | SNP (transition)   | 38.10% |
| T | 175 | 175 | 1 | C -> T | 363 | SNP (transition)   | 42.70% |
| T | 176 | 176 | 1 | C -> T | 360 | SNP (transition)   | 66.40% |
| A | 178 | 178 | 1 | C -> A | 352 | SNP (transversion) | 31.50% |
| T | 178 | 178 | 1 | C -> T | 352 | SNP (transition)   | 27.60% |
| T | 180 | 180 | 1 | C -> T | 342 | SNP (transition)   | 64.60% |
| A | 181 | 181 | 1 | G -> A | 332 | SNP (transition)   | 50.30% |
| T | 182 | 182 | 1 | A -> T | 325 | SNP (transversion) | 57.20% |
| C | 183 | 183 | 1 | A -> C | 320 | SNP (transversion) | 35.60% |
| A | 185 | 185 | 1 | G -> A | 303 | SNP (transition)   | 63.70% |
| T | 188 | 188 | 1 | C -> T | 252 | SNP (transition)   | 55.60% |
| A | 190 | 190 | 1 | G -> A | 245 | SNP (transition)   | 47.30% |
| A | 191 | 191 | 1 | G -> A | 237 | SNP (transition)   | 31.20% |
| T | 192 | 192 | 1 | C -> T | 232 | SNP (transition)   | 31.90% |
| A | 193 | 193 | 1 | T -> A | 225 | SNP (transversion) | 42.70% |
| G | 193 | 193 | 1 | T -> G | 225 | SNP (transversion) | 31.60% |
| A | 194 | 194 | 1 | T -> A | 213 | SNP (transversion) | 38.00% |
| C | 194 | 194 | 1 | T -> C | 213 | SNP (transition)   | 26.30% |
| A | 195 | 195 | 1 | T -> A | 207 | SNP (transversion) | 44.00% |
| A | 196 | 196 | 1 | T -> A | 201 | SNP (transversion) | 53.70% |
| A | 197 | 197 | 1 | T -> A | 193 | SNP (transversion) | 42.50% |
| C | 197 | 197 | 1 | T -> C | 193 | SNP (transition)   | 36.30% |
| A | 198 | 198 | 1 | T -> A | 189 | SNP (transversion) | 36.00% |
| C | 198 | 198 | 1 | T -> C | 189 | SNP (transition)   | 28.00% |
| A | 199 | 199 | 1 | G -> A | 184 | SNP (transition)   | 35.90% |
| G | 201 | 201 | 1 | A -> G | 177 | SNP (transition)   | 32.20% |
| T | 201 | 201 | 1 | A -> T | 177 | SNP (transversion) | 36.70% |
| G | 202 | 202 | 1 | T -> G | 175 | SNP (transversion) | 52.60% |
| C | 204 | 204 | 1 | T -> C | 168 | SNP (transition)   | 25.60% |



|   |       |       |   |        |     |                           |        |           |                                |                            |      |            |
|---|-------|-------|---|--------|-----|---------------------------|--------|-----------|--------------------------------|----------------------------|------|------------|
| C | 10129 | 10129 | 1 | G -> C | 460 | SNP<br>(transversion<br>) | 65.00% | 0         | calcium-binding<br>protein CDS | calcium-binding<br>protein | None | KLI70416.1 |
| T | 10159 | 10159 | 1 | C -> T | 469 | SNP<br>(transition)       | 51.80% | 0         | calcium-binding<br>protein CDS | calcium-binding<br>protein | None | KLI70416.1 |
| G | 10405 | 10405 | 1 | C -> G | 535 | SNP<br>(transversion<br>) | 57.40% | 0         | calcium-binding<br>protein CDS | calcium-binding<br>protein | None | KLI70416.1 |
| G | 10441 | 10441 | 1 | A -> G | 566 | SNP<br>(transition)       | 67.50% | 0         | calcium-binding<br>protein CDS | calcium-binding<br>protein | None | KLI70416.1 |
| C | 10498 | 10498 | 1 | T -> C | 534 | SNP<br>(transition)       | 73.00% | 0         | calcium-binding<br>protein CDS | calcium-binding<br>protein | None | KLI70416.1 |
| T | 10532 | 10532 | 1 | C -> T | 110 | SNP<br>(transition)       | 58.20% | 5.60E-187 | calcium-binding<br>protein CDS | calcium-binding<br>protein | None | KLI70416.1 |
| G | 10120 | 10120 | 1 | T -> G | 476 | SNP<br>(transversion<br>) | 38.40% | 0         | calcium-binding<br>protein CDS | calcium-binding<br>protein | None | KLI70416.1 |
| C | 10129 | 10129 | 1 | G -> C | 460 | SNP<br>(transversion<br>) | 65.00% | 0         | calcium-binding<br>protein CDS | calcium-binding<br>protein | None | KLI70416.1 |
| T | 10145 | 10145 | 1 | C -> T | 452 | SNP<br>(transition)       | 48.00% | 0         | calcium-binding<br>protein CDS | calcium-binding<br>protein | None | KLI70416.1 |
| C | 10153 | 10153 | 1 | T -> C | 454 | SNP<br>(transition)       | 48.90% | 0         | calcium-binding<br>protein CDS | calcium-binding<br>protein | None | KLI70416.1 |
| T | 10159 | 10159 | 1 | C -> T | 469 | SNP<br>(transition)       | 51.80% | 0         | calcium-binding<br>protein CDS | calcium-binding<br>protein | None | KLI70416.1 |
| A | 10204 | 10204 | 1 | C -> A | 433 | SNP<br>(transversion<br>) | 37.60% | 0         | calcium-binding<br>protein CDS | calcium-binding<br>protein | None | KLI70416.1 |
| C | 10273 | 10273 | 1 | T -> C | 511 | SNP<br>(transition)       | 41.10% | 0         | calcium-binding<br>protein CDS | calcium-binding<br>protein | None | KLI70416.1 |
| G | 10282 | 10282 | 1 | C -> G | 494 | SNP<br>(transversion<br>) | 38.10% | 0         | calcium-binding<br>protein CDS | calcium-binding<br>protein | None | KLI70416.1 |
| T | 10351 | 10351 | 1 | A -> T | 497 | SNP<br>(transversion<br>) | 30.80% | 0         | calcium-binding<br>protein CDS | calcium-binding<br>protein | None | KLI70416.1 |
| T | 10360 | 10360 | 1 | C -> T | 487 | SNP<br>(transition)       | 27.50% | 0         | calcium-binding<br>protein CDS | calcium-binding<br>protein | None | KLI70416.1 |
| A | 10369 | 10369 | 1 | G -> A | 485 | SNP<br>(transition)       | 41.90% | 0         | calcium-binding<br>protein CDS | calcium-binding<br>protein | None | KLI70416.1 |
| A | 10387 | 10387 | 1 | G -> A | 498 | SNP<br>(transition)       | 39.40% | 0         | calcium-binding<br>protein CDS | calcium-binding<br>protein | None | KLI70416.1 |
| C | 10396 | 10396 | 1 | T -> C | 548 | SNP<br>(transition)       | 48.40% | 0         | calcium-binding<br>protein CDS | calcium-binding<br>protein | None | KLI70416.1 |
| G | 10405 | 10405 | 1 | C -> G | 535 | SNP<br>(transversion<br>) | 57.40% | 0         | calcium-binding<br>protein CDS | calcium-binding<br>protein | None | KLI70416.1 |

|     |       |       |   |                |               |                           |                   |           |                                |                            |                  |                |             |
|-----|-------|-------|---|----------------|---------------|---------------------------|-------------------|-----------|--------------------------------|----------------------------|------------------|----------------|-------------|
| G   | 10414 | 10414 | 1 | A -> G         | 523           | SNP<br>(transition)       | 34.00%            | 0         | calcium-binding<br>protein CDS | calcium-binding<br>protein | None             | KLI70416.1     |             |
| T   | 10429 | 10429 | 1 | C -> T         | 557           | SNP<br>(transition)       | 42.50%            | 0         | calcium-binding<br>protein CDS | calcium-binding<br>protein | None             | KLI70416.1     |             |
| T   | 10432 | 10432 | 1 | C -> T         | 565           | SNP<br>(transition)       | 27.60%            | 0         | calcium-binding<br>protein CDS | calcium-binding<br>protein | None             | KLI70416.1     |             |
| GT  | 10434 | 10435 | 2 | CG -><br>GT    | 562           | Substitution              | 29.0% -><br>29.2% | 0         | calcium-binding<br>protein CDS | calcium-binding<br>protein | Substitutio<br>n | KLI70416.<br>1 | T -> S      |
| G   | 10441 | 10441 | 1 | A -> G         | 566           | SNP<br>(transition)       | 67.50%            | 0         | calcium-binding<br>protein CDS | calcium-binding<br>protein | None             | KLI70416.1     |             |
| C   | 10444 | 10444 | 1 | A -> C         | 576           | SNP<br>(transversion<br>) | 45.00%            | 0         | calcium-binding<br>protein CDS | calcium-binding<br>protein | None             | KLI70416.1     |             |
| T   | 10444 | 10444 | 1 | A -> T         | 576           | SNP<br>(transversion<br>) | 28.10%            | 0         | calcium-binding<br>protein CDS | calcium-binding<br>protein | None             | KLI70416.1     |             |
| C   | 10447 | 10447 | 1 | T -> C         | 568           | SNP<br>(transition)       | 32.40%            | 0         | calcium-binding<br>protein CDS | calcium-binding<br>protein | None             | KLI70416.1     |             |
| ACC | 10481 | 10483 | 2 | TCA -<br>> ACC | 539 -><br>557 | Substitution              | 38.2% -><br>38.4% | 0         | calcium-binding<br>protein CDS | calcium-binding<br>protein | Substitutio<br>n | KLI70416.<br>1 | S -> T      |
| C   | 10486 | 10486 | 1 | T -> C         | 537           | SNP<br>(transition)       | 34.60%            | 0         | calcium-binding<br>protein CDS | calcium-binding<br>protein | None             | KLI70416.1     |             |
| C   | 10498 | 10498 | 1 | T -> C         | 534           | SNP<br>(transition)       | 73.00%            | 0         | calcium-binding<br>protein CDS | calcium-binding<br>protein | None             | KLI70416.1     |             |
| G   | 10510 | 10510 | 1 | C -> G         | 136           | SNP<br>(transversion<br>) | 43.40%            | 7.10E-174 | calcium-binding<br>protein CDS | calcium-binding<br>protein | Substitutio<br>n | KLI70416.<br>1 | D -> E      |
| C   | 10516 | 10516 | 1 | G -> C         | 119           | SNP<br>(transversion<br>) | 49.60%            | 1.50E-172 | calcium-binding<br>protein CDS | calcium-binding<br>protein | None             | KLI70416.1     |             |
| T   | 10532 | 10532 | 1 | C -> T         | 110           | SNP<br>(transition)       | 58.20%            | 5.60E-187 | calcium-binding<br>protein CDS | calcium-binding<br>protein | None             | KLI70416.1     |             |
| A   | 10534 | 10534 | 1 | G -> A         | 107           | SNP<br>(transition)       | 38.30%            | 2.60E-110 | calcium-binding<br>protein CDS | calcium-binding<br>protein | None             | KLI70416.1     |             |
| C   | 10540 | 10540 | 1 | T -> C         | 102           | SNP<br>(transition)       | 35.30%            | 1.20E-102 | calcium-binding<br>protein CDS | calcium-binding<br>protein | None             | KLI70416.1     |             |
| T   | 10546 | 10546 | 1 | C -> T         | 94            | SNP<br>(transition)       | 29.80%            | 1.00E-77  | calcium-binding<br>protein CDS | calcium-binding<br>protein | None             | KLI70416.1     |             |
| AG  | 10549 | 10550 | 2 | GT -><br>AG    | 93 -> 94      | Substitution              | 29.0% -><br>29.8% | 6.00E-72  | calcium-binding<br>protein CDS | calcium-binding<br>protein | Substitutio<br>n | KLI70416.<br>1 | ES -><br>EA |

## Contig 29

| Name | Minimum | Maximum | Length | Change       | Coverage   | Polymorphism Type  | Variant Frequency |
|------|---------|---------|--------|--------------|------------|--------------------|-------------------|
| G    | 133     | 133     | 1      | A -> G       | 227        | SNP (transition)   | 36.60%            |
| T    | 135     | 135     | 1      | A -> T       | 233        | SNP (transversion) | 35.60%            |
| T    | 137     | 136     | 0      |              | 221        | Insertion          | 27.60%            |
| T    | 141     | 141     | 1      | C -> T       | 207        | SNP (transition)   | 30.00%            |
| T    | 142     | 142     | 1      | C -> T       | 206        | SNP (transition)   | 40.30%            |
| C    | 143     | 143     | 1      | T -> C       | 206        | SNP (transition)   | 53.90%            |
| C    | 145     | 145     | 1      | T -> C       | 207        | SNP (transition)   | 52.70%            |
| CG   | 147     | 148     | 2      | TC -> CG     | 208 -> 210 | Substitution       | 29.5% -> 29.8%    |
| A    | 151     | 151     | 1      | G -> A       | 206        | SNP (transition)   | 39.30%            |
| C    | 154     | 154     | 1      | T -> C       | 206        | SNP (transition)   | 41.70%            |
| C    | 165     | 165     | 1      | A -> C       | 186        | SNP (transversion) | 37.10%            |
| T    | 168     | 168     | 1      | G -> T       | 170        | SNP (transversion) | 53.50%            |
| A    | 250     | 250     | 1      | T -> A       | 147        | SNP (transversion) | 51.70%            |
| AG   | 252     | 253     | 2      | TT -> AG     | 146        | Substitution       | 51.40%            |
| TCTC | 255     | 258     | 4      | ATAA -> TCTC | 144 -> 150 | Substitution       | 48.0% -> 50.0%    |
| C    | 260     | 260     | 1      | T -> C       | 148        | SNP (transition)   | 47.30%            |
| GT   | 262     | 263     | 2      | AA -> GT     | 144 -> 145 | Substitution       | 46.5% -> 46.9%    |
| C    | 265     | 265     | 1      | G -> C       | 140        | SNP (transversion) | 48.60%            |
|      | 266     | 279     | 14     |              | 137 -> 161 | Deletion           | 33.5% -> 39.4%    |
| T    | 281     | 281     | 1      | C -> T       | 157        | SNP (transition)   | 46.50%            |
| GT   | 286     | 287     | 2      | AA -> GT     | 169 -> 172 | Substitution       | 44.8% -> 45.6%    |
| C    | 290     | 290     | 1      | T -> C       | 179        | SNP (transition)   | 43.60%            |
| AC   | 291     | 292     | 2      | GA -> AC     | 181        | Substitution       | 51.40%            |

|    |     |     |   |          |            |              |                |
|----|-----|-----|---|----------|------------|--------------|----------------|
| AT | 294 | 295 | 2 | GC -> AT | 194 -> 195 | Substitution | 37.9% -> 38.1% |
|    | 298 | 299 | 2 |          | 212        | Deletion     | 35.80%         |

Contig 31

| Name   | Minimum | Maximum | Length | Change                   | Coverage   | Polymorphism Type         | Variant Frequency | Variant P-Value (approximate) | Amino Acid Change | CDS                            | product                    | Protein Effect | protein_id |
|--------|---------|---------|--------|--------------------------|------------|---------------------------|-------------------|-------------------------------|-------------------|--------------------------------|----------------------------|----------------|------------|
|        | 16050   | 16055   | 6      | (TCTGCT)11 -> (TCTGCT)10 | 586 -> 587 | Deletion (tandem repeat)  | 98.6% -> 98.8%    | 0                             | EAE -> E          | cell division protein FtsY CDS | cell division protein FtsY | Deletion       | KLI70360.1 |
| TCTGCT | 16116   | 16115   | 0      | (TCTGCT)11 -> (TCTGCT)12 | 627 -> 637 | Insertion (tandem repeat) | 97.1% -> 97.2%    | 0                             | P -> PAE          | cell division protein FtsY CDS | cell division protein FtsY | Insertion      | KLI70360.1 |
|        | 16050   | 16055   | 6      | (TCTGCT)11 -> (TCTGCT)10 | 586 -> 587 | Deletion (tandem repeat)  | 98.6% -> 98.8%    | 0                             | EAE -> E          | cell division protein FtsY CDS | cell division protein FtsY | Deletion       | KLI70360.1 |
| TCTGCT | 16116   | 16115   | 0      | (TCTGCT)11 -> (TCTGCT)12 | 627 -> 637 | Insertion (tandem repeat) | 97.1% -> 97.2%    | 0                             | P -> PAE          | cell division protein FtsY CDS | cell division protein FtsY | Insertion      | KLI70360.1 |

Contig 34

| Name | Minimum | Maximum | Length | Change   | Coverage   | Polymorphism Type  | Variant Frequency | Variant P-Value (approximate) | Amino Acid Change | CDS                     | product             | Protein Effect | protein_id |
|------|---------|---------|--------|----------|------------|--------------------|-------------------|-------------------------------|-------------------|-------------------------|---------------------|----------------|------------|
| G    | 3957    | 3957    | 1      | A -> G   | 165        | SNP (transition)   | 48.50%            | 2.60E-240                     |                   | nucleoside permease CDS | nucleoside permease | None           | KLI70272.1 |
| AT   | 3996    | 3997    | 2      | GC -> AT | 145 -> 146 | Substitution       | 47.3% -> 47.6%    | 1.50E-199                     | RH -> RY          | nucleoside permease CDS | nucleoside permease | Substitution   | KLI70272.1 |
| G    | 4024    | 4024    | 1      | T -> G   | 116        | SNP (transversion) | 39.70%            | 5.00E-129                     | E -> D            | nucleoside permease CDS | nucleoside permease | Substitution   | KLI70272.1 |

Contig 38

| Name | Minimum | Maximum | Length | Change | Coverage | Polymorphism Type  | Variant Frequency | Variant P-Value (approximate) |
|------|---------|---------|--------|--------|----------|--------------------|-------------------|-------------------------------|
| G    | 22      | 22      | 1      | A -> G | 147      | SNP (transition)   | 28.60%            | 1.10E-110                     |
| G    | 30      | 30      | 1      | A -> G | 144      | SNP (transition)   | 25.70%            | 2.00E-99                      |
| A    | 45      | 45      | 1      | T -> A | 116      | SNP (transversion) | 25.00%            | 2.70E-66                      |

## Contig 40

| Name | Minimum | Maximum | Length | Change | Coverage | Polymorphism Type  | Variant Frequency | Variant P-Value (approximate) |
|------|---------|---------|--------|--------|----------|--------------------|-------------------|-------------------------------|
| C    | 66081   | 66081   | 1      | G -> C | 133      | SNP (transversion) | 26.30%            | 1.50E-87                      |
| G    | 66087   | 66087   | 1      | A -> G | 130      | SNP (transition)   | 26.90%            | 5.90E-95                      |
| A    | 66092   | 66092   | 1      | G -> A | 128      | SNP (transition)   | 26.60%            | 1.20E-88                      |
| T    | 66114   | 66114   | 1      | C -> T | 121      | SNP (transition)   | 28.90%            | 3.20E-96                      |

## Contig 46

| Name | Minimum | Maximum | Length | Change | Coverage | Polymorphism Type  | Variant Frequency |
|------|---------|---------|--------|--------|----------|--------------------|-------------------|
| A    | 1890    | 1890    | 1      | G -> A | 160      | SNP (transition)   | 35.60%            |
| G    | 1920    | 1920    | 1      | A -> G | 161      | SNP (transition)   | 44.70%            |
| A    | 1999    | 1999    | 1      | C -> A | 194      | SNP (transversion) | 29.40%            |

## Contig 50

| Name | Minimum | Maximum | Length | Change | Coverage | Polymorphism Type  | Variant Frequency |
|------|---------|---------|--------|--------|----------|--------------------|-------------------|
| A    | 63513   | 63513   | 1      | T -> A | 174      | SNP (transversion) | 25.30%            |

## Contig 51

| Name | Minimum | Maximum | Length | Change   | Coverage | Polymorphism Type | Variant Frequency |
|------|---------|---------|--------|----------|----------|-------------------|-------------------|
| AT   | 2815    | 2816    | 2      | CG -> AT | 132      | Substitution      | 61.40%            |
| A    | 2820    | 2820    | 1      | G -> A   | 133      | SNP (transition)  | 60.90%            |
| T    | 2846    | 2846    | 1      | C -> T   | 139      | SNP (transition)  | 43.90%            |
| T    | 2860    | 2860    | 1      | C -> T   | 144      | SNP (transition)  | 36.80%            |

## Contig 53

| Name | Minimum | Maximum | Length | Change | Coverage | Polymorphism Type  | Variant Frequency |
|------|---------|---------|--------|--------|----------|--------------------|-------------------|
| A    | 36      | 36      | 1      | G -> A | 284      | SNP (transition)   | 33.50%            |
| T    | 856     | 856     | 1      | A -> T | 3113     | SNP (transversion) | 26.10%            |
| C    | 1196    | 1196    | 1      | A -> C | 2706     | SNP (transversion) | 48.90%            |
| A    | 2748    | 2748    | 1      | C -> A | 3893     | SNP (transversion) | 32.80%            |
| A    | 2757    | 2757    | 1      | G -> A | 3992     | SNP (transition)   | 32.80%            |
| C    | 2759    | 2759    | 1      | T -> C | 3921     | SNP (transition)   | 32.90%            |

#### Contig 54

| Name | Minimum | Maximum | Length | Change       | Coverage   | Polymorphism Type         | Variant Frequency |
|------|---------|---------|--------|--------------|------------|---------------------------|-------------------|
| A    | 46      | 46      | 1      | G -> A       | 650        | SNP (transition)          | 26.80%            |
| G    | 61      | 61      | 1      | A -> G       | 611        | SNP (transition)          | 35.50%            |
| T    | 72      | 72      | 1      | C -> T       | 550        | SNP (transition)          | 36.90%            |
| G    | 1153    | 1153    | 1      | A -> G       | 4320       | SNP (transition)          | 30.70%            |
| C    | 1173    | 1173    | 1      | T -> C       | 4389       | SNP (transition)          | 37.30%            |
| G    | 1550    | 1550    | 1      | A -> G       | 2697       | SNP (transition)          | 26.40%            |
| A    | 1679    | 1678    | 0      | (A)2 -> (A)3 | 822        | Insertion (tandem repeat) | 31.50%            |
| CGAA | 1707    | 1710    | 4      | TTTC -> CGAA | 502 -> 510 | Substitution              | 29.8% -> 30.1%    |

#### Contig 57

| Name | Minimum | Maximum | Length | Change | Coverage | Polymorphism Type  | Variant Frequency | Variant P-Value (approximate) | Amino Acid Change | CDS           | product   | Protein Effect | protein_id  |
|------|---------|---------|--------|--------|----------|--------------------|-------------------|-------------------------------|-------------------|---------------|-----------|----------------|-------------|
| G    | 159     | 159     | 1      | T -> G | 275      | SNP (transversion) | 53.50%            | 0                             |                   | RTX toxin CDS | RTX toxin | None           | KLI6996 8.1 |
| G    | 173     | 173     | 1      | A -> G | 307      | SNP (transition)   | 51.50%            | 0                             | D -> G            | RTX toxin CDS | RTX toxin | Substitution   | KLI6996 8.1 |
| A    | 201     | 201     | 1      | G -> A | 344      | SNP (transition)   | 54.70%            | 0                             |                   | RTX toxin CDS | RTX toxin | None           | KLI6996 8.1 |
| C    | 1122    | 1122    | 1      | A -> C | 404      | SNP (transversion) | 53.50%            | 0                             |                   | RTX toxin CDS | RTX toxin | None           | KLI6996 8.1 |
| A    | 1159    | 1159    | 1      | G -> A | 417      | SNP (transition)   | 51.60%            | 0                             | A -> T            | RTX toxin CDS | RTX toxin | Substitution   | KLI6996 8.1 |



|   |      |      |   |        |     |                    |        |   |        |               |           |              |             |
|---|------|------|---|--------|-----|--------------------|--------|---|--------|---------------|-----------|--------------|-------------|
| G | 1191 | 1191 | 1 | A -> G | 404 | SNP (transition)   | 50.50% | 0 |        | RTX toxin CDS | RTX toxin | None         | KLI6996 8.1 |
| T | 1323 | 1323 | 1 | C -> T | 391 | SNP (transition)   | 60.90% | 0 |        | RTX toxin CDS | RTX toxin | None         | KLI6996 8.1 |
| C | 1353 | 1353 | 1 | T -> C | 397 | SNP (transition)   | 60.50% | 0 |        | RTX toxin CDS | RTX toxin | None         | KLI6996 8.1 |
| G | 159  | 159  | 1 | T -> G | 275 | SNP (transversion) | 53.50% | 0 |        | RTX toxin CDS | RTX toxin | None         | KLI6996 8.1 |
| G | 173  | 173  | 1 | A -> G | 307 | SNP (transition)   | 51.50% | 0 | D -> G | RTX toxin CDS | RTX toxin | Substitution | KLI6996 8.1 |
| A | 201  | 201  | 1 | G -> A | 344 | SNP (transition)   | 54.70% | 0 |        | RTX toxin CDS | RTX toxin | None         | KLI6996 8.1 |
| G | 363  | 363  | 1 | A -> G | 379 | SNP (transition)   | 47.80% | 0 |        | RTX toxin CDS | RTX toxin | None         | KLI6996 8.1 |
| G | 427  | 427  | 1 | A -> G | 380 | SNP (transition)   | 49.70% | 0 | I -> V | RTX toxin CDS | RTX toxin | Substitution | KLI6996 8.1 |
| C | 437  | 437  | 1 | T -> C | 366 | SNP (transition)   | 49.70% | 0 | L -> S | RTX toxin CDS | RTX toxin | Substitution | KLI6996 8.1 |
| G | 723  | 723  | 1 | A -> G | 351 | SNP (transition)   | 49.60% | 0 |        | RTX toxin CDS | RTX toxin | None         | KLI6996 8.1 |
| G | 728  | 728  | 1 | T -> G | 342 | SNP (transversion) | 49.40% | 0 | V -> G | RTX toxin CDS | RTX toxin | Substitution | KLI6996 8.1 |
| A | 745  | 745  | 1 | G -> A | 334 | SNP (transition)   | 49.10% | 0 | A -> T | RTX toxin CDS | RTX toxin | Substitution | KLI6996 8.1 |
| A | 840  | 840  | 1 | G -> A | 306 | SNP (transition)   | 48.40% | 0 |        | RTX toxin CDS | RTX toxin | None         | KLI6996 8.1 |
| C | 986  | 986  | 1 | T -> C | 284 | SNP (transition)   | 47.90% | 0 | I -> T | RTX toxin CDS | RTX toxin | Substitution | KLI6996 8.1 |
| T | 1019 | 1019 | 1 | C -> T | 311 | SNP (transition)   | 45.70% | 0 | T -> M | RTX toxin CDS | RTX toxin | Substitution | KLI6996 8.1 |
| C | 1122 | 1122 | 1 | A -> C | 404 | SNP (transversion) | 53.50% | 0 |        | RTX toxin CDS | RTX toxin | None         | KLI6996 8.1 |
| A | 1159 | 1159 | 1 | G -> A | 417 | SNP (transition)   | 51.60% | 0 | A -> T | RTX toxin CDS | RTX toxin | Substitution | KLI6996 8.1 |
| G | 1191 | 1191 | 1 | A -> G | 404 | SNP (transition)   | 50.50% | 0 |        | RTX toxin CDS | RTX toxin | None         | KLI6996 8.1 |
| T | 1323 | 1323 | 1 | C -> T | 391 | SNP (transition)   | 60.90% | 0 |        | RTX toxin CDS | RTX toxin | None         | KLI6996 8.1 |
| C | 1353 | 1353 | 1 | T -> C | 397 | SNP (transition)   | 60.50% | 0 |        | RTX toxin CDS | RTX toxin | None         | KLI6996 8.1 |
| T | 1418 | 1418 | 1 | C -> T | 371 | SNP (transition)   | 39.90% | 0 | S -> L | RTX toxin CDS | RTX toxin | Substitution | KLI6996 8.1 |
| G | 1425 | 1425 | 1 | A -> G | 374 | SNP (transition)   | 40.90% | 0 |        | RTX toxin CDS | RTX toxin | None         | KLI6996 8.1 |

## Contig 58

| Name | Minimum | Maximum | Length | Change       | Coverage | Polymorphism Type | Variant Frequency |
|------|---------|---------|--------|--------------|----------|-------------------|-------------------|
| TTAA | 1       | 4       | 4      | AACC -> TTAA | 2        | Substitution      | 100.00%           |
| TA   | 6       | 7       | 2      | AT -> TA     | 2        | Substitution      | 100.00%           |
| AAC  | 9       | 11      | 3      | TCA -> AAC   | 2        | Substitution      | 100.00%           |
| CT   | 13      | 14      | 2      | GA -> CT     | 2        | Substitution      | 100.00%           |

## Contig 59

| Name  | Minimum | Maximum | Length | Change         | Coverage | Polymorphism Type  | Variant Frequency |
|-------|---------|---------|--------|----------------|----------|--------------------|-------------------|
| ACAAA | 17      | 21      | 5      | GTTGT -> ACAAA | 75 -> 76 | Substitution       | 54.7% -> 55.3%    |
| T     | 22      | 22      | 1      | G -> T         | 66       | SNP (transversion) | 69.70%            |
| T     | 23      | 23      | 1      | G -> T         | 65       | SNP (transversion) | 55.40%            |
| TCA   | 25      | 27      | 3      | CGG -> TCA     | 59 -> 63 | Substitution       | 54.1% -> 57.4%    |
| C     | 28      | 28      | 1      | T -> C         | 60       | SNP (transition)   | 65.00%            |
| TA    | 29      | 30      | 2      | AT -> TA       | 58 -> 60 | Substitution       | 53.3% -> 53.4%    |
| AC    | 33      | 34      | 2      | TA -> AC       | 52 -> 53 | Substitution       | 53.8% -> 54.7%    |
| T     | 35      | 35      | 1      | A -> T         | 51       | SNP (transversion) | 66.70%            |
| T     | 36      | 36      | 1      | G -> T         | 50       | SNP (transversion) | 54.00%            |
| AG    | 37      | 38      | 2      | GA -> AG       | 46 -> 49 | Substitution       | 67.3% -> 69.6%    |
| T     | 39      | 39      | 1      | G -> T         | 47       | SNP (transversion) | 55.30%            |
| T     | 41      | 41      | 1      | A -> T         | 47       | SNP (transversion) | 66.00%            |
| T     | 44      | 44      | 1      | G -> T         | 46       | SNP (transversion) | 54.30%            |
| A     | 45      | 45      | 1      | T -> A         | 45       | SNP (transversion) | 64.40%            |
| T     | 47      | 47      | 1      | C -> T         | 33       | SNP (transition)   | 39.40%            |
| AT    | 48      | 49      | 2      | GA -> AT       | 30       | Substitution       | 50.00%            |
| TG    | 50      | 51      | 2      | CT -> TG       | 29       | Substitution       | 31.00%            |

## Contig 60

| Name | Minimum | Maximum | Length | Change | Coverage | Polymorphism Type | Variant Frequency |
|------|---------|---------|--------|--------|----------|-------------------|-------------------|
| C    | 98      | 98      | 1      | T -> C | 116      | SNP (transition)  | 43.10%            |

Contig 61

| Name | Minimum | Maximum | Length | Change   | Coverage | Polymorphism Type  | Variant Frequency |
|------|---------|---------|--------|----------|----------|--------------------|-------------------|
| A    | 8       | 8       | 1      | T -> A   | 3        | SNP (transversion) | 100.00%           |
| TC   | 11      | 12      | 2      | CA -> TC | 3        | Substitution       | 66.70%            |
| C    | 29      | 29      | 1      | T -> C   | 3        | SNP (transition)   | 66.70%            |

Contig 62

| Name | Minimum | Maximum | Length | Change   | Coverage | Polymorphism Type  | Variant Frequency |
|------|---------|---------|--------|----------|----------|--------------------|-------------------|
| CG   | 2723    | 2724    | 2      | TT -> CG | 30       | Substitution       | 100.00%           |
| T    | 2728    | 2728    | 1      | C -> T   | 30       | SNP (transition)   | 100.00%           |
| T    | 2744    | 2744    | 1      | A -> T   | 23       | SNP (transversion) | 100.00%           |
| A    | 2747    | 2747    | 1      | G -> A   | 23       | SNP (transition)   | 100.00%           |

Contig 63

| Name             | Minimum | Maximum | Length | Change                   | Coverage   | Polymorphism Type         | Variant Frequency | Variant P-Value (approximate) | Amino Acid Change | CDS                      | product              | Protein Effect | protein_id |
|------------------|---------|---------|--------|--------------------------|------------|---------------------------|-------------------|-------------------------------|-------------------|--------------------------|----------------------|----------------|------------|
| GCAACA<br>GCAACA | 89      | 88      | 0      | (AGCAAC)14 -> (AGCAAC)16 | 144 -> 161 | Insertion (tandem repeat) | 99.3% -> 99.4%    | 0                             | Q -> QQQQ<br>Q    | hypothetical protein CDS | hypothetical protein | Insertion      | KLI69899.1 |
| GCAACA<br>GCAACA | 89      | 88      | 0      | (AGCAAC)14 -> (AGCAAC)16 | 144 -> 161 | Insertion (tandem repeat) | 99.3% -> 99.4%    | 0                             | Q -> QQQQ<br>Q    | hypothetical protein CDS | hypothetical protein | Insertion      | KLI69899.1 |
