# Supplementary material for: Perturbation of Quorum Sensing after the Acquisition of Bacteriophage Resistance Could Contribute to Novel Traits in Vibrio alginolyticus
Source: MDPI journal article supplement (doi:10.3390/microorganisms11092273), 2023-09-10
Supplement: s1 [file s1]

**Skliros et al., 2023. Supplemental Table S4.** Single Nucleotide Polymorphisms of resistant strain **VaAthena1\_B** for each Contig separately. Tables show Nucleotide shift, position, change, polymorphism, type, variant frequency and in the case of a mutation in a CDS product, protein, effect and protein\_id.

---

### Contig 3

| Name | Minimum | Maximum | Length | Change | Coverage | Polymorphism Type  | Variant Frequency |
|------|---------|---------|--------|--------|----------|--------------------|-------------------|
| A    | 2716    | 2716    | 1      | T -> A | 5        | SNP (transversion) | 40.00%            |

### Contig 6

| Name | Minimum | Maximum | Length | Change   | Coverage   | Polymorphism Type  | Variant Frequency |
|------|---------|---------|--------|----------|------------|--------------------|-------------------|
| AT   | 49      | 50      | 2      | TC -> AT | 155 -> 156 | Substitution       | 27.1% -> 27.6%    |
| T    | 52      | 52      | 1      | C -> T   | 160        | SNP (transition)   | 28.70%            |
| T    | 64      | 64      | 1      | A -> T   | 183        | SNP (transversion) | 32.20%            |

|                                                                                               |         |     |   |                                                                                                       |                           |                         |                              |
|-----------------------------------------------------------------------------------------------|---------|-----|---|-------------------------------------------------------------------------------------------------------|---------------------------|-------------------------|------------------------------|
|                                                                                               |         |     |   |                                                                                                       |                           | svers<br>ion)           |                              |
| T                                                                                             | 15<br>2 | 151 | 0 |                                                                                                       | 23<br>6                   | Inser<br>tion           | 39.<br>40<br>%               |
| G                                                                                             | 15<br>5 | 155 | 1 | A -> G                                                                                                | 23<br>5                   | SNP<br>(tran<br>sition) | 39.<br>10<br>%               |
| TCA                                                                                           | 15<br>7 | 159 | 3 | ATT -> TCA                                                                                            | 23<br>0 -<br>><br>23<br>8 | Subs<br>tituti<br>on    | 38.<br>7%<br>-><br>39.<br>6% |
| GT                                                                                            | 16<br>2 | 163 | 2 | TC -> GT                                                                                              | 22<br>6 -<br>><br>22<br>9 | Subs<br>tituti<br>on    | 40.<br>2%<br>-><br>40.<br>7% |
| TTAAAATGGCTACGTAGCTCAGCTGGTTAG<br>AGCACATCACTCATAATGATGGGGTCACAG<br>GTTCGAATCCCGTCGTAGCCACCAT | 16<br>5 | 165 | 1 | A -><br>TTAAAATGGCTACGTAGCTCAGCTGGTTAG<br>AGCACATCACTCATAATGATGGGGTCACAG<br>GTTCGAATCCCGTCGTAGCCACCAT | 19<br>5 -<br>><br>22<br>3 | Inser<br>tion           | 30.<br>8%<br>-><br>38.<br>3% |
| A                                                                                             | 16<br>6 | 165 | 0 |                                                                                                       | 18<br>9                   | Inser<br>tion           | 31.<br>70<br>%               |
| TT                                                                                            | 16<br>6 | 165 | 0 |                                                                                                       | 18<br>1 -<br>><br>18<br>2 | Inser<br>tion           | 28.<br>7%<br>-><br>29.<br>1% |
| T                                                                                             | 16<br>6 | 165 | 0 |                                                                                                       | 17<br>9                   | Inser<br>tion           | 27.<br>90<br>%               |

|    |     |     |   |          |            |                    |                |
|----|-----|-----|---|----------|------------|--------------------|----------------|
| T  | 166 | 165 | 0 |          | 172        | Insertion          | 25.00%         |
| AA | 310 | 311 | 2 | CC -> AA | 142 -> 166 | Substitution       | 30.3% -> 38.0% |
| T  | 390 | 390 | 1 | C -> T   | 186        | SNP (transition)   | 54.80%         |
| C  | 397 | 397 | 1 | T -> C   | 158        | SNP (transition)   | 36.70%         |
| C  | 420 | 420 | 1 | T -> C   | 351        | SNP (transition)   | 51.00%         |
| A  | 428 | 428 | 1 | T -> A   | 391        | SNP (transversion) | 46.50%         |
| A  | 436 | 436 | 1 | T -> A   | 436        | SNP (transversion) | 48.60%         |
| C  | 437 | 437 | 1 | T -> C   | 436        | SNP (transition)   | 31.40%         |

Contig 7

| Name | Minimum | Maximum | Length | Change | Coverage | Polymorphism Type  | Variant Frequency | Variant P-Value (approximate) | Amino Acid Change | CDS                         | product                 | Protein Effect | protein_id |
|------|---------|---------|--------|--------|----------|--------------------|-------------------|-------------------------------|-------------------|-----------------------------|-------------------------|----------------|------------|
| C    | 216879  | 216879  | 1      | T -> C | 418      | SNP (transition)   | 41.40 %           | 0                             |                   | calcium-binding protein CDS | calcium-binding protein | None           | KLI72868.1 |
| C    | 216885  | 216885  | 1      | A -> C | 421      | SNP (transversion) | 40.60 %           | 0                             |                   | calcium-binding protein CDS | calcium-binding protein | None           | KLI72868.1 |
| C    | 216888  | 216888  | 1      | G -> C | 425      | SNP (transversion) | 41.20 %           | 0                             |                   | calcium-binding protein CDS | calcium-binding protein | None           | KLI72868.1 |
| T    | 216921  | 216921  | 1      | C -> T | 401      | SNP (transition)   | 39.70 %           | 0                             |                   | calcium-binding protein CDS | calcium-binding protein | None           | KLI72868.1 |
| T    | 216924  | 216924  | 1      | C -> T | 399      | SNP (transition)   | 39.30 %           | 0                             |                   | calcium-binding protein CDS | calcium-binding protein | None           | KLI72868.1 |
| C    | 216927  | 216927  | 1      | G -> C | 401      | SNP (transversion) | 38.90 %           | 0                             |                   | calcium-binding protein CDS | calcium-binding protein | None           | KLI72868.1 |
| A    | 216942  | 216942  | 1      | T -> A | 385      | SNP (transversion) | 33.80 %           | 0                             |                   | calcium-binding protein CDS | calcium-binding protein | None           | KLI72868.1 |
| G    | 216951  | 216951  | 1      | A -> G | 414      | SNP (transition)   | 29.50 %           | 4.0E-320                      |                   | calcium-binding protein CDS | calcium-binding protein | None           | KLI72868.1 |

Contig 13

| Name | Minimum | Maximum | Length | Change | Coverage | Polymorphism Type | Variant Frequency |
|------|---------|---------|--------|--------|----------|-------------------|-------------------|
|------|---------|---------|--------|--------|----------|-------------------|-------------------|

|   |        |        |   |        |     |                     |        |
|---|--------|--------|---|--------|-----|---------------------|--------|
| A | 286321 | 286321 | 1 | G -> A | 483 | SNP<br>(transition) | 32.10% |
|---|--------|--------|---|--------|-----|---------------------|--------|

#### Contig 14

| Name | Minimum | Maximum | Length | Change       | Coverage     | Polymorphism Type  | Variant Frequency | Variant P-Value (approximate) | Amino Acid Change | CDS                      | product              | Protein Effect | protein_id |
|------|---------|---------|--------|--------------|--------------|--------------------|-------------------|-------------------------------|-------------------|--------------------------|----------------------|----------------|------------|
| A    | 7       | 7       | 1      | G -> A       | 3598         | SNP (transition)   | 38.20%            | 0                             |                   | hypothetical protein CDS | hypothetical protein | None           | KLI71769.1 |
| AATC | 10      | 13      | 3      | CACG -> AATC | 3499 -> 3602 | Substitution       | 35.5% -> 35.9%    | 0                             | TV -> TI          | hypothetical protein CDS | hypothetical protein | Substitution   | KLI71769.1 |
| G    | 22      | 22      | 1      | A -> G       | 3473         | SNP (transition)   | 41.70%            | 0                             |                   | hypothetical protein CDS | hypothetical protein | None           | KLI71769.1 |
| G    | 31      | 31      | 1      | A -> G       | 3465         | SNP (transition)   | 81.70%            | 0                             |                   | hypothetical protein CDS | hypothetical protein | None           | KLI71769.1 |
| A    | 34      | 34      | 1      | G -> A       | 3491         | SNP (transition)   | 81.90%            | 0                             |                   | hypothetical protein CDS | hypothetical protein | None           | KLI71769.1 |
| T    | 52      | 52      | 1      | C -> T       | 3543         | SNP (transition)   | 37.80%            | 0                             |                   | hypothetical protein CDS | hypothetical protein | None           | KLI71769.1 |
| C    | 55      | 55      | 1      | T -> C       | 3588         | SNP (transition)   | 37.30%            | 0                             |                   | hypothetical protein CDS | hypothetical protein | None           | KLI71769.1 |
| C    | 61      | 61      | 1      | G -> C       | 3620         | SNP (transversion) | 63.30%            | 0                             |                   | hypothetical protein CDS | hypothetical protein | None           | KLI71769.1 |

|    |     |     |   |          |               |                  |                 |   |        |                          |                      |              |             |
|----|-----|-----|---|----------|---------------|------------------|-----------------|---|--------|--------------------------|----------------------|--------------|-------------|
| AC | 66  | 67  | 2 | GT -> AC | 3550 - > 3571 | Substitution     | 63.4% - > 63.6% | 0 |        | hypothetical protein CDS | hypothetical protein | None         | KLI71 769.1 |
| G  | 73  | 73  | 1 | A -> G   | 3569          | SNP (transition) | 63.50%          | 0 |        | hypothetical protein CDS | hypothetical protein | None         | KLI71 769.1 |
| C  | 120 | 120 | 1 | T -> C   | 805           | SNP (transition) | 54.30%          | 0 | K -> E | hypothetical protein CDS | hypothetical protein | Substitution | KLI71 769.1 |
| C  | 175 | 175 | 1 | T -> C   | 578           | SNP (transition) | 49.70%          | 0 |        | hypothetical protein CDS | hypothetical protein | None         | KLI71 769.1 |

#### Contig 15

| Name                   | Minimum | Maximum | Length | Change                                           | Coverage   | Polymorphism Type  | Variant Frequency |
|------------------------|---------|---------|--------|--------------------------------------------------|------------|--------------------|-------------------|
| C                      | 1       | 1       | 1      | A -> C                                           | 169        | SNP (transversion) | 96.40%            |
| ATATCAG                | 4       | 10      | 7      | CATATCA -> ATATCAG                               | 169 -> 182 | Substitution       | 87.4% -> 94.1%    |
| ACG                    | 12      | 14      | 3      | GAC -> ACG                                       | 183        | Substitution       | 87.40%            |
| TCAG                   | 17      | 20      | 4      | GTCA -> TCAG                                     | 186 -> 190 | Substitution       | 83.7% -> 85.5%    |
| TA                     | 22      | 23      | 2      | GT -> TA                                         | 193        | Substitution       | 81.3% -> 82.4%    |
| CATCACTGCTCGCTCTGTCTAT | 26      | 47      | 22     | ACATCACTGCTCGCTCTGTCTA -> CATCACTGCTCGCTCTGTCTAT | 191 -> 206 | Substitution       | 70.4% -> 80.3%    |
| CT                     | 49      | 50      | 2      | TC -> CT                                         | 201 -> 203 | Substitution       | 69.7% -> 70.9%    |

|          |     |     |   |                      |            |                    |                |
|----------|-----|-----|---|----------------------|------------|--------------------|----------------|
| GTCTCATA | 52  | 59  | 8 | TGTCTCAT -> GTCTCATA | 191 -> 198 | Substitution       | 63.6% -> 68.2% |
| C        | 62  | 62  | 1 | A -> C               | 197        | SNP (transversion) | 62.90%         |
| GCTGA    | 64  | 68  | 5 | CGCTG -> GCTGA       | 199 -> 203 | Substitution       | 59.1% -> 60.8% |
| CACAT    | 70  | 74  | 5 | ACACA -> CACAT       | 198 -> 201 | Substitution       | 55.3% -> 58.7% |
| GA       | 76  | 77  | 2 | TG -> GA             | 205        | Substitution       | 53.20%         |
| G        | 80  | 80  | 1 | A -> G               | 205        | SNP (transition)   | 53.20%         |
| C        | 82  | 82  | 1 | G -> C               | 204        | SNP (transversion) | 52.00%         |
| ATATA    | 84  | 88  | 5 | CATAT -> ATATA       | 198 -> 205 | Substitution       | 48.8% -> 50.5% |
| CG       | 92  | 93  | 2 | AC -> CG             | 205        | Substitution       | 47.30%         |
| CTCAGTAC | 95  | 102 | 8 | GCTCAGTA -> CTCAGTAC | 213 -> 216 | Substitution       | 43.5% -> 45.1% |
| A        | 104 | 104 | 1 | C -> A               | 216        | SNP (transversion) | 42.60%         |
| CGT      | 107 | 109 | 3 | ACG -> CGT           | 211 -> 216 | Substitution       | 39.3% -> 41.2% |
| GCACA    | 111 | 115 | 5 | TGCAC -> GCACA       | 213 -> 214 | Substitution       | 37.9% -> 38.0% |
| G        | 117 | 117 | 1 | A -> G               | 216        | SNP (transition)   | 38.00%         |
| T        | 119 | 119 | 1 | G -> T               | 221        | SNP (transversion) | 37.10%         |
| CTG      | 121 | 123 | 3 | TCT -> CTG           | 221 -> 222 | Substitution       | 36.2% -> 36.5% |
| TG       | 125 | 126 | 2 | GT -> TG             | 222        | Substitution       | 35.6% -> 36.0% |

|          |     |     |   |                      |            |                    |                |
|----------|-----|-----|---|----------------------|------------|--------------------|----------------|
| CTGA     | 128 | 131 | 4 | GCTG -> CTGA         | 225 -> 228 | Substitution       | 33.9% -> 35.1% |
| TCTCA    | 133 | 137 | 5 | ATCTC -> TCTCA       | 226 -> 233 | Substitution       | 31.8% -> 33.3% |
| T        | 139 | 139 | 1 | A -> T               | 233        | SNP (transversion) | 31.80%         |
| ACAC     | 141 | 144 | 4 | TACA -> ACAC         | 228 -> 232 | Substitution       | 30.3% -> 31.2% |
| ATCGCACT | 146 | 153 | 8 | CATCGCAC -> ATCGCACT | 221 -> 226 | Substitution       | 24.9% -> 27.6% |

#### Contig 16

| Name | Minimum | Maximum | Length | Change                   | Coverage   | Polymorphism Type        | Variant Frequency | Variant P-Value (approximate) | Amino Acid Change | CDS                         | product                 | Protein Effect | protein_id |
|------|---------|---------|--------|--------------------------|------------|--------------------------|-------------------|-------------------------------|-------------------|-----------------------------|-------------------------|----------------|------------|
|      | 50291   | 50296   | 6      | (CAGAGC)14 -> (CAGAGC)13 | 361 -> 362 | Deletion (tandem repeat) | 98.9% -> 99.2%    | 0                             | AE P -> A         | chemotaxis protein CheW CDS | chemotaxis protein CheW | Deletion       | KLI71480.1 |



|            |           |           |   |                                     |                  |                                 |                      |   |             |                                   |                               |               |                    |
|------------|-----------|-----------|---|-------------------------------------|------------------|---------------------------------|----------------------|---|-------------|-----------------------------------|-------------------------------|---------------|--------------------|
| GCC<br>AGA | 5037<br>9 | 5037<br>8 | 0 | (CAGAGC)1<br>4 -><br>(CAGAGC)1<br>5 | 361<br>-><br>368 | Insertion<br>(tandem<br>repeat) | 92.8%<br>-><br>92.9% | 0 | E -><br>EPE | chemotaxis<br>protein CheW<br>CDS | chemotaxis<br>protein<br>CheW | Inse<br>rtion | KLI7<br>1480.<br>1 |
|------------|-----------|-----------|---|-------------------------------------|------------------|---------------------------------|----------------------|---|-------------|-----------------------------------|-------------------------------|---------------|--------------------|

#### Contig 17

| Name | Minimum | Maximum | Length | Change      | Coverage      | Polymorphism<br>Type  | Variant<br>Frequency |
|------|---------|---------|--------|-------------|---------------|-----------------------|----------------------|
| G    | 22      | 22      | 1      | A -> G      | 165           | SNP (transition)      | 41.20%               |
| A    | 36      | 36      | 1      | G -> A      | 164           | SNP (transition)      | 35.40%               |
| C    | 72      | 73      | 2      | AT -><br>C  | 163 -><br>166 | Deletion              | 30.7% -><br>31.3%    |
| A    | 216849  | 216848  | 0      |             | 98            | Insertion             | 83.70%               |
| T    | 216850  | 216850  | 1      | A -> T      | 92            | SNP<br>(transversion) | 89.10%               |
|      | 216856  | 216857  | 2      |             | 357 -><br>366 | Deletion              | 53.3% -><br>54.6%    |
| A    | 216861  | 216861  | 1      | T -> A      | 357           | SNP<br>(transversion) | 38.70%               |
| C    | 216862  | 216862  | 1      | T -> C      | 354           | SNP (transition)      | 54.00%               |
| T    | 216864  | 216864  | 1      | G -> T      | 354           | SNP<br>(transversion) | 60.50%               |
| T    | 216866  | 216866  | 1      | G -> T      | 359           | SNP<br>(transversion) | 53.50%               |
| T    | 216868  | 216868  | 1      | C -> T      | 364           | SNP (transition)      | 53.00%               |
| GA   | 216871  | 216872  | 2      | TT -><br>GA | 345 -><br>348 | Substitution          | 52.8% -><br>53.2%    |
| AA   | 216875  | 216875  | 1      | C -><br>AA  | 329 -><br>337 | Insertion             | 46.6% -><br>46.8%    |
| T    | 216878  | 216878  | 1      | C -> T      | 329           | SNP (transition)      | 47.10%               |
| G    | 216882  | 216882  | 1      | T -> G      | 307           | SNP<br>(transversion) | 49.80%               |

|   |        |        |   |        |     |                       |        |
|---|--------|--------|---|--------|-----|-----------------------|--------|
| C | 216946 | 216946 | 1 | A -> C | 213 | SNP<br>(transversion) | 34.30% |
|   | 216955 | 216955 | 1 |        | 196 | Deletion              | 26.50% |
| A | 216958 | 216958 | 1 | T -> A | 189 | SNP<br>(transversion) | 27.50% |
| G | 217109 | 217109 | 1 | A -> G | 172 | SNP (transition)      | 78.50% |

#### Contig 18

| Name | Minimum | Maximum | Length | Change          | Coverage | Polymorphism<br>Type  | Variant<br>Frequency |
|------|---------|---------|--------|-----------------|----------|-----------------------|----------------------|
| A    | 306     | 306     | 1      | C -> A          | 183      | SNP<br>(transversion) | 25.70%               |
| A    | 308     | 308     | 1      | G -> A          | 184      | SNP (transition)      | 25.00%               |
| GTAG | 311     | 314     | 4      | TCTT -><br>GTAG | 187      | Substitution          | 25.70%               |

#### Contig 19

| Name            | Minimum | Maximum | Length | Change                                | Coverage      | Polymorphism<br>Type  | Variant<br>Frequency |
|-----------------|---------|---------|--------|---------------------------------------|---------------|-----------------------|----------------------|
| GC              | 96      | 97      | 2      | CA -> GC                              | 162 -><br>163 | Substitution          | 25.8% -><br>25.9%    |
| A               | 99      | 99      | 1      | T -> A                                | 168           | SNP<br>(transversion) | 29.80%               |
| T               | 197     | 197     | 1      | C -> T                                | 143           | SNP<br>(transition)   | 28.70%               |
| CATTGTTATATCTCA | 200     | 214     | 15     | GCGGAGGCACATATT -><br>CATTGTTATATCTCA | 112 -><br>134 | Substitution          | 25.9% -><br>30.2%    |

|        |     |     |   |                  |               |              |                   |
|--------|-----|-----|---|------------------|---------------|--------------|-------------------|
| AAGAGA | 216 | 221 | 6 | CGTTTT -> AAGAGA | 103 -><br>112 | Substitution | 25.2% -><br>26.9% |
|--------|-----|-----|---|------------------|---------------|--------------|-------------------|

# Contig 23

| Name  | Minimum | Maximum | Length | Change            | Coverage      | Polymorphism Type     | Variant Frequency |
|-------|---------|---------|--------|-------------------|---------------|-----------------------|-------------------|
| CT    | 2       | 3       | 2      | TA -> CT          | 270 -><br>271 | Substitution          | 41.7% -><br>41.9% |
| T     | 6       | 6       | 1      | G -> T            | 278           | SNP<br>(transversion) | 57.20%            |
| T     | 68      | 68      | 1      | G -> T            | 145           | SNP<br>(transversion) | 53.80%            |
| C     | 70      | 70      | 1      | T -> C            | 145           | SNP<br>(transition)   | 53.80%            |
| GTT   | 72      | 74      | 3      | TGC -> GTT        | 145           | Substitution          | 53.80%            |
| C     | 78      | 78      | 1      | A -> C            | 147           | SNP<br>(transversion) | 62.60%            |
| T     | 79      | 79      | 1      | A -> T            | 147           | SNP<br>(transversion) | 53.10%            |
| T     | 80      | 80      | 1      | G -> T            | 147           | SNP<br>(transversion) | 62.60%            |
| GC    | 82      | 83      | 2      | TT -> GC          | 147 -><br>148 | Substitution          | 52.7% -><br>53.1% |
| CAAAA | 85      | 89      | 5      | TCTCT -><br>CAAAA | 147 -><br>148 | Substitution          | 52.0% -><br>52.4% |
| GGA   | 92      | 94      | 3      | AAG -> GGA        | 150           | Substitution          | 51.30%            |
| C     | 98      | 102     | 5      | AGGTG -> C        | 150 -><br>155 | Deletion              | 50.3% -><br>52.0% |
| T     | 107     | 107     | 1      | C -> T            | 156           | SNP<br>(transition)   | 58.30%            |
| G     | 114     | 114     | 1      | T -> G            | 160           | SNP<br>(transversion) | 48.80%            |
| A     | 118     | 118     | 1      | G -> A            | 160           | SNP<br>(transition)   | 48.10%            |

|        |     |     |   |                     |               |                       |                   |
|--------|-----|-----|---|---------------------|---------------|-----------------------|-------------------|
| A      | 119 | 119 | 1 | T -> A              | 160           | SNP<br>(transversion) | 56.90%            |
| G      | 120 | 120 | 1 | T -> G              | 160           | SNP<br>(transversion) | 47.50%            |
| T      | 121 | 121 | 1 | G -> T              | 160           | SNP<br>(transversion) | 56.90%            |
| T      | 132 | 132 | 1 | A -> T              | 150           | SNP<br>(transversion) | 44.70%            |
| C      | 142 | 141 | 0 | +C                  | 131           | Insertion             | 36.60%            |
| TTC    | 147 | 149 | 3 | AAT -> TTC          | 123 -><br>124 | Substitution          | 39.8% -><br>40.3% |
| CAA    | 152 | 154 | 3 | TTT -> CAA          | 114 -><br>121 | Substitution          | 33.3% -><br>36.4% |
| CGTTTC | 156 | 161 | 6 | TAGAAG -><br>CGTTTC | 93 -><br>106  | Substitution          | 29.1% -><br>31.2% |
| GC     | 163 | 164 | 2 | TT -> GC            | 90 -> 92      | Substitution          | 26.7% -><br>28.3% |
| G      | 167 | 167 | 1 | T -> G              | 86            | SNP<br>(transversion) | 26.70%            |

#### Contig 27

| Name                                     | Minimum | Maximum | Length | Change                                                            | Coverage         | Polymorphism Type            | Variant Frequency | CDS                            | product                 | Protein Effect | protein_id | Amino Acid Change             |
|------------------------------------------|---------|---------|--------|-------------------------------------------------------------------|------------------|------------------------------|-------------------|--------------------------------|-------------------------|----------------|------------|-------------------------------|
| GCAACAGCAACAGCAACA<br>GCAACAGCAACAGCAACA | 27340   | 27339   | 0      | (AACAGCAAC<br>AGCAACAGC)<br>4 -><br>(AACAGCAAC<br>AGCAACAGC)<br>6 | 114<br>-><br>188 | Insertion<br>(tandem repeat) | 86.4% -><br>88.8% | hypothetical<br>protein<br>CDS | hypothetical<br>protein | Insertion      | KLI70436.1 | Q -><br>QQQQQQ<br>QQQQQQ<br>Q |

## Contig 28

| Name | Minimum | Maximum | Length | Change | Coverage | Polymorphism Type  | Variant Frequency | Variant P-Value (approximate) | CDS                         | product                 | Protein Effect | protein_id  |
|------|---------|---------|--------|--------|----------|--------------------|-------------------|-------------------------------|-----------------------------|-------------------------|----------------|-------------|
| G    | 10120   | 10120   | 1      | T -> G | 1011     | SNP (transversion) | 47.50 %           | 0                             | calcium-binding protein CDS | calcium-binding protein | None           | KLI704 16.1 |
| C    | 10129   | 10129   | 1      | G -> C | 987      | SNP (transversion) | 72.70 %           | 0                             | calcium-binding protein CDS | calcium-binding protein | None           | KLI704 16.1 |
| T    | 10145   | 10145   | 1      | C -> T | 955      | SNP (transition)   | 55.70 %           | 0                             | calcium-binding protein CDS | calcium-binding protein | None           | KLI704 16.1 |
| C    | 10153   | 10153   | 1      | T -> C | 962      | SNP (transition)   | 58.60 %           | 0                             | calcium-binding protein CDS | calcium-binding protein | None           | KLI704 16.1 |
| T    | 10159   | 10159   | 1      | C -> T | 991      | SNP (transition)   | 61.00 %           | 0                             | calcium-binding protein CDS | calcium-binding protein | None           | KLI704 16.1 |
| A    | 10204   | 10204   | 1      | C -> A | 879      | SNP (transversion) | 33.90 %           | 0                             | calcium-binding protein CDS | calcium-binding protein | None           | KLI704 16.1 |
| C    | 10273   | 10273   | 1      | T -> C | 992      | SNP (transition)   | 43.00 %           | 0                             | calcium-binding protein CDS | calcium-binding protein | None           | KLI704 16.1 |

|   |       |       |   |        |      |                         |            |   |                                   |                            |              |                |
|---|-------|-------|---|--------|------|-------------------------|------------|---|-----------------------------------|----------------------------|--------------|----------------|
| G | 10282 | 10282 | 1 | C -> G | 1005 | SNP<br>(transversion)   | 43.20<br>% | 0 | calcium-binding<br>protein<br>CDS | calcium-binding<br>protein | None         | KLI704<br>16.1 |
| T | 10322 | 10322 | 1 | G -> T | 1026 | SNP<br>(transversion)   | 27.10<br>% | 0 | calcium-binding<br>protein<br>CDS | calcium-binding<br>protein | Substitution | KLI704<br>16.1 |
| T | 10351 | 10351 | 1 | A -> T | 998  | SNP<br>(transversion)   | 35.70<br>% | 0 | calcium-binding<br>protein<br>CDS | calcium-binding<br>protein | None         | KLI704<br>16.1 |
| T | 10360 | 10360 | 1 | C -> T | 1003 | SNP<br>(transition<br>) | 28.60<br>% | 0 | calcium-binding<br>protein<br>CDS | calcium-binding<br>protein | None         | KLI704<br>16.1 |
| A | 10369 | 10369 | 1 | G -> A | 976  | SNP<br>(transition<br>) | 41.70<br>% | 0 | calcium-binding<br>protein<br>CDS | calcium-binding<br>protein | None         | KLI704<br>16.1 |
| A | 10387 | 10387 | 1 | G -> A | 1003 | SNP<br>(transition<br>) | 41.30<br>% | 0 | calcium-binding<br>protein<br>CDS | calcium-binding<br>protein | None         | KLI704<br>16.1 |
| C | 10396 | 10396 | 1 | T -> C | 1084 | SNP<br>(transition<br>) | 45.20<br>% | 0 | calcium-binding<br>protein<br>CDS | calcium-binding<br>protein | None         | KLI704<br>16.1 |
| G | 10405 | 10405 | 1 | C -> G | 1056 | SNP<br>(transversion)   | 56.30<br>% | 0 | calcium-binding<br>protein<br>CDS | calcium-binding<br>protein | None         | KLI704<br>16.1 |
| G | 10414 | 10414 | 1 | A -> G | 1050 | SNP<br>(transition<br>) | 34.50<br>% | 0 | calcium-binding<br>protein<br>CDS | calcium-binding<br>protein | None         | KLI704<br>16.1 |

|     |       |       |   |               |                     |                           |                      |   |                                       |                                |                  |                |
|-----|-------|-------|---|---------------|---------------------|---------------------------|----------------------|---|---------------------------------------|--------------------------------|------------------|----------------|
| T   | 10429 | 10429 | 1 | C -> T        | 1067                | SNP<br>(transition<br>)   | 39.60<br>%           | 0 | calcium-<br>binding<br>protein<br>CDS | calcium-<br>binding<br>protein | None             | KLI704<br>16.1 |
| T   | 10432 | 10432 | 1 | C -> T        | 1069                | SNP<br>(transition<br>)   | 27.50<br>%           | 0 | calcium-<br>binding<br>protein<br>CDS | calcium-<br>binding<br>protein | None             | KLI704<br>16.1 |
| GT  | 10434 | 10435 | 2 | CG -> GT      | 1067 -<br>><br>1069 | Substituti<br>on          | 32.7%<br>-><br>32.9% | 0 | calcium-<br>binding<br>protein<br>CDS | calcium-<br>binding<br>protein | Substitu<br>tion | KLI704<br>16.1 |
| G   | 10441 | 10441 | 1 | A -> G        | 1072                | SNP<br>(transition<br>)   | 71.70<br>%           | 0 | calcium-<br>binding<br>protein<br>CDS | calcium-<br>binding<br>protein | None             | KLI704<br>16.1 |
| C   | 10444 | 10444 | 1 | A -> C        | 1099                | SNP<br>(transvers<br>ion) | 47.10<br>%           | 0 | calcium-<br>binding<br>protein<br>CDS | calcium-<br>binding<br>protein | None             | KLI704<br>16.1 |
| T   | 10444 | 10444 | 1 | A -> T        | 1099                | SNP<br>(transvers<br>ion) | 26.10<br>%           | 0 | calcium-<br>binding<br>protein<br>CDS | calcium-<br>binding<br>protein | None             | KLI704<br>16.1 |
| C   | 10447 | 10447 | 1 | T -> C        | 1104                | SNP<br>(transition<br>)   | 26.30<br>%           | 0 | calcium-<br>binding<br>protein<br>CDS | calcium-<br>binding<br>protein | None             | KLI704<br>16.1 |
| ACC | 10481 | 10483 | 2 | TCA -><br>ACC | 1012 -<br>><br>1022 | Substituti<br>on          | 49.6%<br>-><br>50.1% | 0 | calcium-<br>binding<br>protein<br>CDS | calcium-<br>binding<br>protein | Substitu<br>tion | KLI704<br>16.1 |
| C   | 10486 | 10486 | 1 | T -> C        | 997                 | SNP<br>(transition<br>)   | 43.50<br>%           | 0 | calcium-<br>binding<br>protein<br>CDS | calcium-<br>binding<br>protein | None             | KLI704<br>16.1 |

|                |       |       |   |                                     |             |                           |                      |               |                                       |                                |                  |                |
|----------------|-------|-------|---|-------------------------------------|-------------|---------------------------|----------------------|---------------|---------------------------------------|--------------------------------|------------------|----------------|
| C              | 10498 | 10498 | 1 | T -> C                              | 967         | SNP<br>(transition<br>)   | 72.00<br>%           | 0             | calcium-<br>binding<br>protein<br>CDS | calcium-<br>binding<br>protein | None             | KLI704<br>16.1 |
| A              | 10534 | 10534 | 1 | G -> A                              | 63          | SNP<br>(transition<br>)   | 87.30<br>%           | 3.90E-<br>167 | calcium-<br>binding<br>protein<br>CDS | calcium-<br>binding<br>protein | None             | KLI704<br>16.1 |
| C              | 10540 | 10540 | 1 | T -> C                              | 54          | SNP<br>(transition<br>)   | 90.70<br>%           | 1.00E-<br>165 | calcium-<br>binding<br>protein<br>CDS | calcium-<br>binding<br>protein | None             | KLI704<br>16.1 |
| T              | 10546 | 10546 | 1 | C -> T                              | 45          | SNP<br>(transition<br>)   | 80.00<br>%           | 8.80E-<br>118 | calcium-<br>binding<br>protein<br>CDS | calcium-<br>binding<br>protein | None             | KLI704<br>16.1 |
| AG             | 10549 | 10550 | 2 | GT -> AG                            | 33 -><br>34 | Substituti<br>on          | 36.4%<br>-><br>38.2% | 2.90E-37      | calcium-<br>binding<br>protein<br>CDS | calcium-<br>binding<br>protein | Substitu<br>tion | KLI704<br>16.1 |
| AGCGGA<br>AACG | 10549 | 10558 | 9 | GTCCACT<br>GTT -><br>AGCGGA<br>AACG | 21 -><br>34 | Substituti<br>on          | 29.4%<br>-><br>43.5% | 8.00E-18      | calcium-<br>binding<br>protein<br>CDS | calcium-<br>binding<br>protein | Substitu<br>tion | KLI704<br>16.1 |
| G              | 10564 | 10564 | 1 | C -> G                              | 23          | SNP<br>(transvers<br>ion) | 34.80<br>%           | 1.20E-16      | calcium-<br>binding<br>protein<br>CDS | calcium-<br>binding<br>protein | None             | KLI704<br>16.1 |

#### Contig 29

| Name | Minimum | Maximum | Length | Change | Coverage | Polymorphism<br>Type | Variant<br>Frequency |
|------|---------|---------|--------|--------|----------|----------------------|----------------------|
| G    | 133     | 133     | 1      | A -> G | 227      | SNP (transition)     | 36.60%               |



|      |     |     |    |              |            |                    |                |
|------|-----|-----|----|--------------|------------|--------------------|----------------|
| T    | 135 | 135 | 1  | A -> T       | 233        | SNP (transversion) | 35.60%         |
| T    | 137 | 136 | 0  |              | 221        | Insertion          | 27.60%         |
| T    | 141 | 141 | 1  | C -> T       | 207        | SNP (transition)   | 30.00%         |
| T    | 142 | 142 | 1  | C -> T       | 206        | SNP (transition)   | 40.30%         |
| C    | 143 | 143 | 1  | T -> C       | 206        | SNP (transition)   | 53.90%         |
| C    | 145 | 145 | 1  | T -> C       | 207        | SNP (transition)   | 52.70%         |
| CG   | 147 | 148 | 2  | TC -> CG     | 208 -> 210 | Substitution       | 29.5% -> 29.8% |
| A    | 151 | 151 | 1  | G -> A       | 206        | SNP (transition)   | 39.30%         |
| C    | 154 | 154 | 1  | T -> C       | 206        | SNP (transition)   | 41.70%         |
| C    | 165 | 165 | 1  | A -> C       | 186        | SNP (transversion) | 37.10%         |
| T    | 168 | 168 | 1  | G -> T       | 170        | SNP (transversion) | 53.50%         |
| A    | 250 | 250 | 1  | T -> A       | 147        | SNP (transversion) | 51.70%         |
| AG   | 252 | 253 | 2  | TT -> AG     | 146        | Substitution       | 51.40%         |
| TCTC | 255 | 258 | 4  | ATAA -> TCTC | 144 -> 150 | Substitution       | 48.0% -> 50.0% |
| C    | 260 | 260 | 1  | T -> C       | 148        | SNP (transition)   | 47.30%         |
| GT   | 262 | 263 | 2  | AA -> GT     | 144 -> 145 | Substitution       | 46.5% -> 46.9% |
| C    | 265 | 265 | 1  | G -> C       | 140        | SNP (transversion) | 48.60%         |
|      | 266 | 279 | 14 |              | 137 -> 161 | Deletion           | 33.5% -> 39.4% |
| T    | 281 | 281 | 1  | C -> T       | 157        | SNP (transition)   | 46.50%         |
| GT   | 286 | 287 | 2  | AA -> GT     | 169 -> 172 | Substitution       | 44.8% -> 45.6% |
| C    | 290 | 290 | 1  | T -> C       | 179        | SNP (transition)   | 43.60%         |
| AC   | 291 | 292 | 2  | GA -> AC     | 181        | Substitution       | 51.40%         |
| AT   | 294 | 295 | 2  | GC -> AT     | 194 -> 195 | Substitution       | 37.9% -> 38.1% |

|  |     |     |   |  |     |          |        |
|--|-----|-----|---|--|-----|----------|--------|
|  | 298 | 299 | 2 |  | 212 | Deletion | 35.80% |
|--|-----|-----|---|--|-----|----------|--------|

#### Contig 31

| Name   | Minimum | Maximum | Length | Change                         | Coverage          | Polymorphism Type            | Variant Frequency | Variant P-Value (approximate) | Amino Acid Change | CDS                                  | product                       | Protein Effect | protein_id |
|--------|---------|---------|--------|--------------------------------|-------------------|------------------------------|-------------------|-------------------------------|-------------------|--------------------------------------|-------------------------------|----------------|------------|
|        | 16050   | 16055   | 6      | (TCTGCT)11<br>-><br>(TCTGCT)10 | 775               | Deletion<br>(tandem repeat)  | 99.00%            | 0                             | EA<br>E -><br>E   | cell division<br>protein FtsY<br>CDS | cell division<br>protein FtsY | Deletion       | KLI70360.1 |
| TCTGCT | 16116   | 16115   | 0      | (TCTGCT)11<br>-><br>(TCTGCT)12 | 812 -<br>><br>826 | Insertion<br>(tandem repeat) | 95.00%            | 0                             | P -><br>PAE       | cell division<br>protein FtsY<br>CDS | cell division<br>protein FtsY | Insertion      | KLI70360.1 |

#### Contig 34

| Name | Minimum | Maximum | Length | Change    | Coverage | Polymorphism Type   | Variant Frequency | Variant P-Value (approximate) | Amino Acid Change | CDS                           | product                | Protein Effect | protein_id |
|------|---------|---------|--------|-----------|----------|---------------------|-------------------|-------------------------------|-------------------|-------------------------------|------------------------|----------------|------------|
| G    | 3957    | 3957    | 1      | A -><br>G | 186      | SNP<br>(transition) | 52.70%            | 6.80E-299                     |                   | nucleoside<br>permease<br>CDS | nucleoside<br>permease | None           | KLI70272.1 |

|    |      |      |   |              |               |                           |                    |           |              |                                    |                                |                  |                |
|----|------|------|---|--------------|---------------|---------------------------|--------------------|-----------|--------------|------------------------------------|--------------------------------|------------------|----------------|
| AT | 3996 | 3997 | 2 | GC -<br>> AT | 156 -><br>157 | Substitutio<br>n          | 50.0% -<br>> 50.3% | 1.10E-234 | RH -<br>> RY | nucleosi<br>de<br>permeas<br>e CDS | nucleosi<br>de<br>permeas<br>e | Substitut<br>ion | KLI7027<br>2.1 |
| G  | 4024 | 4024 | 1 | T -><br>G    | 138           | SNP<br>(transversi<br>on) | 43.50%             | 7.20E-177 | E -><br>D    | nucleosi<br>de<br>permeas<br>e CDS | nucleosi<br>de<br>permeas<br>e | Substitut<br>ion | KLI7027<br>2.1 |
| A  | 7429 | 7429 | 1 | G -><br>A    | 162           | SNP<br>(transition)       | 25.30%             | 1.10E-109 |              |                                    |                                |                  |                |
| A  | 7436 | 7436 | 1 | T -><br>A    | 161           | SNP<br>(transversi<br>on) | 26.10%             | 1.50E-104 |              |                                    |                                |                  |                |
| AA | 7441 | 7442 | 2 | CG -<br>> AA | 158           | Substitutio<br>n          | 27.20%             | 3.20E-112 |              |                                    |                                |                  |                |
| A  | 7444 | 7444 | 1 | C -><br>A    | 160           | SNP<br>(transversi<br>on) | 26.90%             | 6.00E-112 |              |                                    |                                |                  |                |
| G  | 7448 | 7448 | 1 | T -><br>G    | 163           | SNP<br>(transversi<br>on) | 26.40%             | 7.60E-116 |              |                                    |                                |                  |                |
| A  | 7454 | 7454 | 1 | C -><br>A    | 164           | SNP<br>(transversi<br>on) | 26.80%             | 1.80E-114 |              |                                    |                                |                  |                |
| T  | 7474 | 7474 | 1 | G -><br>T    | 159           | SNP<br>(transversi<br>on) | 30.20%             | 1.30E-127 |              |                                    |                                |                  |                |
| A  | 7486 | 7486 | 1 | G -><br>A    | 163           | SNP<br>(transition)       | 31.90%             | 3.40E-129 |              |                                    |                                |                  |                |

Contig 38

| Name | Minimum | Maximum | Length | Change | Coverage | Polymorphism<br>Type | Variant<br>Frequency |
|------|---------|---------|--------|--------|----------|----------------------|----------------------|
| G    | 22      | 22      | 1      | A -> G | 212      | SNP (transition)     | 31.10%               |

|      |    |    |   |                 |               |                       |                   |
|------|----|----|---|-----------------|---------------|-----------------------|-------------------|
| G    | 30 | 31 | 2 | AA -> G         | 195 -><br>198 | Deletion              | 26.7% -><br>27.3% |
| TGCT | 35 | 38 | 4 | AATC -><br>TGCT | 186 -><br>193 | Substitution          | 25.3% -><br>27.1% |
| C    | 41 | 41 | 1 | G -> C          | 184           | SNP<br>(transversion) | 25.50%            |

#### Contig 40

| Name | Minimum | Maximum | Length | Change | Coverage | Polymorphism<br>Type  | Variant<br>Frequency |
|------|---------|---------|--------|--------|----------|-----------------------|----------------------|
| C    | 66081   | 66081   | 1      | G -> C | 178      | SNP<br>(transversion) | 43.30%               |
| G    | 66087   | 66087   | 1      | A -> G | 176      | SNP (transition)      | 43.80%               |
| A    | 66092   | 66092   | 1      | G -> A | 175      | SNP (transition)      | 44.00%               |
| T    | 66114   | 66114   | 1      | C -> T | 169      | SNP (transition)      | 45.60%               |

#### Contig 46

| Name | Minimum | Maximum | Length | Change          | Coverage      | Polymorphism<br>Type  | Variant<br>Frequency |
|------|---------|---------|--------|-----------------|---------------|-----------------------|----------------------|
| A    | 1999    | 1999    | 1      | C -> A          | 248           | SNP<br>(transversion) | 31.50%               |
| G    | 2012    | 2012    | 1      | A -> G          | 247           | SNP (transition)      | 27.50%               |
| GCCC | 2599    | 2602    | 4      | ATTT -><br>GCCC | 359 -><br>365 | Substitution          | 25.6% -><br>26.0%    |
| T    | 2604    | 2604    | 1      | C -> T          | 360           | SNP (transition)      | 26.10%               |
| AGT  | 2607    | 2609    | 3      | CTG -><br>AGT   | 362 -><br>384 | Substitution          | 26.2% -><br>27.8%    |
| A    | 2616    | 2616    | 1      | G -> A          | 380           | SNP (transition)      | 27.40%               |
| T    | 2619    | 2619    | 1      | A -> T          | 365           | SNP<br>(transversion) | 28.50%               |

## Contig 49

| Name | Minimum | Maximum | Length | Change   | Coverage   | Polymorphism Type  | Variant Frequency | Variant P-Value (approximate) | Amino Acid Change | CDS                      | product              | Protein Effect | protein_id |
|------|---------|---------|--------|----------|------------|--------------------|-------------------|-------------------------------|-------------------|--------------------------|----------------------|----------------|------------|
| C    | 8       | 8       | 1      | G -> C   | 1375       | SNP (transversion) | 25.20%            | 0                             | D -> E            | hypothetical protein CDS | hypothetical protein | Substitution   | KLI70043.1 |
| A    | 53      | 53      | 1      | G -> A   | 894        | SNP (transition)   | 32.90%            | 0                             |                   | hypothetical protein CDS | hypothetical protein | None           | KLI70043.1 |
| G    | 59      | 59      | 1      | A -> G   | 853        | SNP (transition)   | 29.30%            | 0                             |                   | hypothetical protein CDS | hypothetical protein | None           | KLI70043.1 |
| G    | 62      | 62      | 1      | A -> G   | 828        | SNP (transition)   | 27.50%            | 0                             |                   | hypothetical protein CDS | hypothetical protein | None           | KLI70043.1 |
| GA   | 73      | 74      | 2      | AG -> GA | 801 -> 803 | Substitution       | 25.6% - 25.8%     | 0                             |                   | hypothetical protein CDS | hypothetical protein | None           | KLI70043.1 |
| G    | 101     | 101     | 1      | A -> G   | 971        | SNP (transition)   | 41.50%            | 0                             |                   | hypothetical protein CDS | hypothetical protein | None           | KLI70043.1 |
| CA   | 109     | 110     | 2      | TC -> CA | 938 -> 945 | Substitution       | 38.0% - 38.1%     | 0                             | AI -> AV          | hypothetical protein CDS | hypothetical protein | Substitution   | KLI70043.1 |
| G    | 113     | 113     | 1      | C -> G   | 913        | SNP (transversion) | 37.60%            | 0                             |                   | hypothetical protein CDS | hypothetical protein | None           | KLI70043.1 |
| A    | 116     | 116     | 1      | G -> A   | 886        | SNP (transition)   | 37.10%            | 0                             |                   | hypothetical protein CDS | hypothetical protein | None           | KLI70043.1 |

|          |     |     |   |                    |                     |                           |                    |   |                 |                             |                          |                  |                |
|----------|-----|-----|---|--------------------|---------------------|---------------------------|--------------------|---|-----------------|-----------------------------|--------------------------|------------------|----------------|
| CTT      | 121 | 123 | 3 | TGG -<br>-> CTT    | 824 -><br>854       | Substituti<br>on          | 34.6% -<br>> 35.7% | 0 | TN -<br>> KD    | hypothetical<br>protein CDS | hypothetica<br>l protein | Substit<br>ution | KLI70<br>043.1 |
| T        | 125 | 125 | 1 | C -> T             | 821                 | SNP<br>(transition<br>)   | 34.70%             | 0 |                 | hypothetical<br>protein CDS | hypothetica<br>l protein | None             | KLI70<br>043.1 |
| G        | 143 | 143 | 1 | C -> G             | 810                 | SNP<br>(transvers<br>ion) | 31.40%             | 0 |                 | hypothetical<br>protein CDS | hypothetica<br>l protein | None             | KLI70<br>043.1 |
| T        | 348 | 348 | 1 | C -> T             | 1711                | SNP<br>(transition<br>)   | 69.10%             | 0 | G -><br>D       | hypothetical<br>protein CDS | hypothetica<br>l protein | Substit<br>ution | KLI70<br>043.1 |
| A        | 374 | 374 | 1 | G -> A             | 1683                | SNP<br>(transition<br>)   | 69.20%             | 0 |                 | hypothetical<br>protein CDS | hypothetica<br>l protein | None             | KLI70<br>043.1 |
| C        | 386 | 386 | 1 | T -> C             | 1652                | SNP<br>(transition<br>)   | 70.30%             | 0 |                 | hypothetical<br>protein CDS | hypothetica<br>l protein | None             | KLI70<br>043.1 |
| T        | 392 | 392 | 1 | G -> T             | 2218                | SNP<br>(transvers<br>ion) | 77.50%             | 0 | N -><br>K       | hypothetical<br>protein CDS | hypothetica<br>l protein | Substit<br>ution | KLI70<br>043.1 |
| A        | 395 | 395 | 1 | G -> A             | 2213                | SNP<br>(transition<br>)   | 65.70%             | 0 |                 | hypothetical<br>protein CDS | hypothetica<br>l protein | None             | KLI70<br>043.1 |
| A        | 407 | 407 | 1 | G -> A             | 2124                | SNP<br>(transition<br>)   | 33.40%             | 0 |                 | hypothetical<br>protein CDS | hypothetica<br>l protein | None             | KLI70<br>043.1 |
| C        | 413 | 413 | 1 | T -> C             | 2099                | SNP<br>(transition<br>)   | 75.10%             | 0 |                 | hypothetical<br>protein CDS | hypothetica<br>l protein | None             | KLI70<br>043.1 |
| T        | 416 | 416 | 1 | A -> T             | 2039                | SNP<br>(transvers<br>ion) | 64.00%             | 0 |                 | hypothetical<br>protein CDS | hypothetica<br>l protein | None             | KLI70<br>043.1 |
| CGC<br>T | 419 | 422 | 3 | GGTA<br>-><br>CGCT | 1939 -<br>><br>4249 | Substituti<br>on          | 17.7% -<br>> 38.8% | 0 | VT -<br>><br>VA | hypothetical<br>protein CDS | hypothetica<br>l protein | Substit<br>ution | KLI70<br>043.1 |

|     |     |     |   |            |              |                    |                |   |          |                          |                      |              |            |
|-----|-----|-----|---|------------|--------------|--------------------|----------------|---|----------|--------------------------|----------------------|--------------|------------|
| CT  | 421 | 422 | 2 | TA -> CT   | 1939 -> 4249 | Substitution       | 27.1% -> 42.6% | 0 | VT -> VA | hypothetical protein CDS | hypothetical protein | Substitution | KLI70043.1 |
| T   | 425 | 425 | 1 | C -> T     | 4308         | SNP (transition)   | 63.00%         | 0 |          | hypothetical protein CDS | hypothetical protein | None         | KLI70043.1 |
| G   | 428 | 428 | 1 | A -> G     | 4275         | SNP (transition)   | 82.30%         | 0 |          | hypothetical protein CDS | hypothetical protein | None         | KLI70043.1 |
| C   | 452 | 452 | 1 | T -> C     | 3641         | SNP (transition)   | 49.10%         | 0 |          | hypothetical protein CDS | hypothetical protein | None         | KLI70043.1 |
| A   | 455 | 455 | 1 | G -> A     | 3646         | SNP (transition)   | 37.20%         | 0 |          | hypothetical protein CDS | hypothetical protein | None         | KLI70043.1 |
| A   | 470 | 470 | 1 | G -> A     | 3517         | SNP (transition)   | 34.10%         | 0 |          | hypothetical protein CDS | hypothetical protein | None         | KLI70043.1 |
| G   | 473 | 473 | 1 | C -> G     | 3509         | SNP (transversion) | 51.80%         | 0 |          | hypothetical protein CDS | hypothetical protein | None         | KLI70043.1 |
| G   | 479 | 479 | 1 | C -> G     | 3482         | SNP (transversion) | 54.80%         | 0 |          | hypothetical protein CDS | hypothetical protein | None         | KLI70043.1 |
| TAG | 482 | 484 | 2 | CAA -> TAG | 3410 -> 3426 | Substitution       | 25.9% -> 26.0% | 0 |          | hypothetical protein CDS | hypothetical protein | None         | KLI70043.1 |
| G   | 484 | 484 | 1 | A -> G     | 3410         | SNP (transition)   | 31.30%         | 0 |          | hypothetical protein CDS | hypothetical protein | None         | KLI70043.1 |
| GGT | 485 | 487 | 2 | CGC -> GGT | 3408 -> 3414 | Substitution       | 25.50%         | 0 | A -> T   | hypothetical protein CDS | hypothetical protein | Substitution | KLI70043.1 |
| C   | 509 | 509 | 1 | G -> C     | 2780         | SNP (transversion) | 36.50%         | 0 |          | hypothetical protein CDS | hypothetical protein | None         | KLI70043.1 |

|   |     |     |   |        |      |                       |        |   |           |                             |                         |              |                |
|---|-----|-----|---|--------|------|-----------------------|--------|---|-----------|-----------------------------|-------------------------|--------------|----------------|
| G | 530 | 530 | 1 | C -> G | 4717 | SNP<br>(transversion) | 35.40% | 0 |           | hypothetical<br>protein CDS | hypothetical<br>protein | None         | KLI70<br>043.1 |
| A | 563 | 563 | 1 | G -> A | 5010 | SNP<br>(transition)   | 31.70% | 0 |           | hypothetical<br>protein CDS | hypothetical<br>protein | None         | KLI70<br>043.1 |
| A | 608 | 608 | 1 | G -> A | 5144 | SNP<br>(transition)   | 41.40% | 0 |           | hypothetical<br>protein CDS | hypothetical<br>protein | None         | KLI70<br>043.1 |
| G | 614 | 614 | 1 | A -> G | 5105 | SNP<br>(transition)   | 33.20% | 0 |           | hypothetical<br>protein CDS | hypothetical<br>protein | None         | KLI70<br>043.1 |
| T | 623 | 623 | 1 | C -> T | 5180 | SNP<br>(transition)   | 26.60% | 0 |           | hypothetical<br>protein CDS | hypothetical<br>protein | None         | KLI70<br>043.1 |
| C | 628 | 628 | 1 | T -> C | 5060 | SNP<br>(transition)   | 42.00% | 0 | N -><br>D | hypothetical<br>protein CDS | hypothetical<br>protein | Substitution | KLI70<br>043.1 |
| G | 671 | 671 | 1 | A -> G | 5212 | SNP<br>(transition)   | 33.00% | 0 |           | hypothetical<br>protein CDS | hypothetical<br>protein | None         | KLI70<br>043.1 |
| T | 675 | 675 | 1 | C -> T | 5085 | SNP<br>(transition)   | 25.30% | 0 | S -><br>N | hypothetical<br>protein CDS | hypothetical<br>protein | Substitution | KLI70<br>043.1 |
| A | 677 | 677 | 1 | G -> A | 5114 | SNP<br>(transition)   | 39.20% | 0 |           | hypothetical<br>protein CDS | hypothetical<br>protein | None         | KLI70<br>043.1 |
| A | 722 | 722 | 1 | G -> A | 5483 | SNP<br>(transition)   | 26.30% | 0 |           | hypothetical<br>protein CDS | hypothetical<br>protein | None         | KLI70<br>043.1 |
| T | 728 | 728 | 1 | C -> T | 5444 | SNP<br>(transition)   | 25.50% | 0 |           | hypothetical<br>protein CDS | hypothetical<br>protein | None         | KLI70<br>043.1 |
| A | 737 | 737 | 1 | G -> A | 5487 | SNP<br>(transition)   | 72.80% | 0 |           | hypothetical<br>protein CDS | hypothetical<br>protein | None         | KLI70<br>043.1 |



|    |     |     |   |             |               |                       |                       |   |                 |                             |                         |              |                |
|----|-----|-----|---|-------------|---------------|-----------------------|-----------------------|---|-----------------|-----------------------------|-------------------------|--------------|----------------|
| C  | 752 | 752 | 1 | G -> C      | 1840          | SNP<br>(transversion) | 44.70%                | 0 |                 | hypothetical<br>protein CDS | hypothetical<br>protein | None         | KLI70<br>043.1 |
| A  | 755 | 755 | 1 | C -> A      | 1865          | SNP<br>(transversion) | 45.10%                | 0 |                 | hypothetical<br>protein CDS | hypothetical<br>protein | None         | KLI70<br>043.1 |
| G  | 806 | 806 | 1 | C -> G      | 1894          | SNP<br>(transversion) | 69.60%                | 0 |                 | hypothetical<br>protein CDS | hypothetical<br>protein | None         | KLI70<br>043.1 |
| C  | 823 | 823 | 1 | T -> C      | 1930          | SNP<br>(transition)   | 56.90%                | 0 | I -><br>V       | hypothetical<br>protein CDS | hypothetical<br>protein | Substitution | KLI70<br>043.1 |
| T  | 834 | 834 | 1 | G -> T      | 1944          | SNP<br>(transversion) | 67.50%                | 0 | T -><br>K       | hypothetical<br>protein CDS | hypothetical<br>protein | Substitution | KLI70<br>043.1 |
| C  | 844 | 844 | 1 | T -> C      | 1412          | SNP<br>(transition)   | 66.80%                | 0 | T -><br>A       | hypothetical<br>protein CDS | hypothetical<br>protein | Substitution | KLI70<br>043.1 |
| A  | 854 | 854 | 1 | G -> A      | 1387          | SNP<br>(transition)   | 66.30%                | 0 |                 | hypothetical<br>protein CDS | hypothetical<br>protein | None         | KLI70<br>043.1 |
| A  | 881 | 881 | 1 | G -> A      | 1452          | SNP<br>(transition)   | 60.50%                | 0 |                 | hypothetical<br>protein CDS | hypothetical<br>protein | None         | KLI70<br>043.1 |
| A  | 887 | 887 | 1 | G -> A      | 1456          | SNP<br>(transition)   | 65.90%                | 0 |                 | hypothetical<br>protein CDS | hypothetical<br>protein | None         | KLI70<br>043.1 |
| G  | 896 | 896 | 1 | A -> G      | 1486          | SNP<br>(transition)   | 67.00%                | 0 |                 | hypothetical<br>protein CDS | hypothetical<br>protein | None         | KLI70<br>043.1 |
| CA | 943 | 944 | 2 | TC -><br>CA | 774 -><br>775 | Substitution          | 36.7% -<br>><br>36.8% | 0 | AI -<br>><br>AV | hypothetical<br>protein CDS | hypothetical<br>protein | Substitution | KLI70<br>043.1 |
| G  | 947 | 947 | 1 | C -> G      | 794           | SNP<br>(transversion) | 38.40%                | 0 |                 | hypothetical<br>protein CDS | hypothetical<br>protein | None         | KLI70<br>043.1 |

|   |      |      |   |        |      |                       |        |   |           |                             |                         |              |                |
|---|------|------|---|--------|------|-----------------------|--------|---|-----------|-----------------------------|-------------------------|--------------|----------------|
| G | 974  | 974  | 1 | A -> G | 1902 | SNP<br>(transition)   | 39.40% | 0 |           | hypothetical<br>protein CDS | hypothetical<br>protein | None         | KLI70<br>043.1 |
| C | 977  | 977  | 1 | G -> C | 1906 | SNP<br>(transversion) | 41.30% | 0 |           | hypothetical<br>protein CDS | hypothetical<br>protein | None         | KLI70<br>043.1 |
| C | 983  | 983  | 1 | T -> C | 1956 | SNP<br>(transition)   | 62.40% | 0 |           | hypothetical<br>protein CDS | hypothetical<br>protein | None         | KLI70<br>043.1 |
| C | 986  | 986  | 1 | G -> C | 1964 | SNP<br>(transversion) | 62.40% | 0 |           | hypothetical<br>protein CDS | hypothetical<br>protein | None         | KLI70<br>043.1 |
| T | 1013 | 1013 | 1 | C -> T | 2498 | SNP<br>(transition)   | 49.10% | 0 |           | hypothetical<br>protein CDS | hypothetical<br>protein | None         | KLI70<br>043.1 |
| C | 1016 | 1016 | 1 | T -> C | 2538 | SNP<br>(transition)   | 32.00% | 0 |           | hypothetical<br>protein CDS | hypothetical<br>protein | None         | KLI70<br>043.1 |
| G | 1025 | 1025 | 1 | C -> G | 2636 | SNP<br>(transversion) | 26.40% | 0 |           | hypothetical<br>protein CDS | hypothetical<br>protein | None         | KLI70<br>043.1 |
| T | 1025 | 1025 | 1 | C -> T | 2636 | SNP<br>(transition)   | 49.00% | 0 |           | hypothetical<br>protein CDS | hypothetical<br>protein | None         | KLI70<br>043.1 |
| T | 1054 | 1054 | 1 | C -> T | 2945 | SNP<br>(transition)   | 60.10% | 0 | A -><br>T | hypothetical<br>protein CDS | hypothetical<br>protein | Substitution | KLI70<br>043.1 |
| A | 1055 | 1055 | 1 | C -> A | 2950 | SNP<br>(transversion) | 34.90% | 0 |           | hypothetical<br>protein CDS | hypothetical<br>protein | None         | KLI70<br>043.1 |
| G | 1055 | 1055 | 1 | C -> G | 2950 | SNP<br>(transversion) | 41.70% | 0 |           | hypothetical<br>protein CDS | hypothetical<br>protein | None         | KLI70<br>043.1 |
| A | 1062 | 1062 | 1 | T -> A | 2947 | SNP<br>(transversion) | 51.80% | 0 | Y -><br>F | hypothetical<br>protein CDS | hypothetical<br>protein | Substitution | KLI70<br>043.1 |

Contig 53

| Name | Minimum | Maximum | Length | Change | Coverage | Polymorphism Type  | Variant Frequency |
|------|---------|---------|--------|--------|----------|--------------------|-------------------|
| A    | 36      | 36      | 1      | G -> A | 347      | SNP (transition)   | 31.70%            |
| T    | 856     | 856     | 1      | A -> T | 6324     | SNP (transversion) | 26.60%            |
| C    | 1196    | 1196    | 1      | A -> C | 5751     | SNP (transversion) | 50.50%            |
| A    | 2748    | 2748    | 1      | C -> A | 5867     | SNP (transversion) | 32.90%            |
| A    | 2757    | 2757    | 1      | G -> A | 5907     | SNP (transition)   | 32.70%            |
| C    | 2759    | 2759    | 1      | T -> C | 5796     | SNP (transition)   | 32.90%            |

Contig 54

| Name | Minimum | Maximum | Length | Change                               | Coverage   | Polymorphism Type         | Variant Frequency |
|------|---------|---------|--------|--------------------------------------|------------|---------------------------|-------------------|
| G    | 61      | 61      | 1      | A -> G                               | 1275       | SNP (transition)          | 32.20%            |
| T    | 72      | 72      | 1      | C -> T                               | 1186       | SNP (transition)          | 33.30%            |
| G    | 1153    | 1153    | 1      | A -> G                               | 8706       | SNP (transition)          | 34.40%            |
| T    | 1172    | 1172    | 1      | C -> T                               | 8585       | SNP (transition)          | 28.00%            |
| C    | 1173    | 1173    | 1      | T -> C                               | 8488       | SNP (transition)          | 43.40%            |
| G    | 1550    | 1550    | 1      | A -> G                               | 4407       | SNP (transition)          | 25.80%            |
| A    | 1679    | 1678    | 0      | (A) <sub>2</sub> -> (A) <sub>3</sub> | 1338       | Insertion (tandem repeat) | 39.00%            |
| CGAA | 1707    | 1710    | 4      | TTTC -> CGAA                         | 836 -> 846 | Substitution              | 33.9% -> 34.1%    |

## Contig 57

| Name | Minimum | Maximum | Length | Change | Coverage | Polymorphism Type  | Variant Frequency | Variant P-Value (approximate) | Amino Acid Change | CDS           | product   | Protein Effect | protein_id  |
|------|---------|---------|--------|--------|----------|--------------------|-------------------|-------------------------------|-------------------|---------------|-----------|----------------|-------------|
| G    | 159     | 159     | 1      | T -> G | 371      | SNP (transversion) | 59.60%            | 0                             |                   | RTX toxin CDS | RTX toxin | None           | KLI6996 8.1 |
| G    | 173     | 173     | 1      | A -> G | 394      | SNP (transition)   | 59.60%            | 0                             | D -> G            | RTX toxin CDS | RTX toxin | Substitution   | KLI6996 8.1 |
| A    | 201     | 201     | 1      | G -> A | 421      | SNP (transition)   | 40.10%            | 0                             |                   | RTX toxin CDS | RTX toxin | None           | KLI6996 8.1 |
| G    | 363     | 363     | 1      | A -> G | 560      | SNP (transition)   | 55.50%            | 0                             |                   | RTX toxin CDS | RTX toxin | None           | KLI6996 8.1 |
| G    | 427     | 427     | 1      | A -> G | 545      | SNP (transition)   | 52.80%            | 0                             | I -> V            | RTX toxin CDS | RTX toxin | Substitution   | KLI6996 8.1 |
| C    | 437     | 437     | 1      | T -> C | 537      | SNP (transition)   | 52.10%            | 0                             | L -> S            | RTX toxin CDS | RTX toxin | Substitution   | KLI6996 8.1 |
| G    | 723     | 723     | 1      | A -> G | 648      | SNP (transition)   | 57.60%            | 0                             |                   | RTX toxin CDS | RTX toxin | None           | KLI6996 8.1 |
| G    | 728     | 728     | 1      | T -> G | 654      | SNP (transversion) | 56.40%            | 0                             | V -> G            | RTX toxin CDS | RTX toxin | Substitution   | KLI6996 8.1 |
| A    | 745     | 745     | 1      | G -> A | 659      | SNP (transition)   | 56.90%            | 0                             | A -> T            | RTX toxin CDS | RTX toxin | Substitution   | KLI6996 8.1 |

|   |      |      |   |        |     |                    |        |   |        |               |           |              |             |
|---|------|------|---|--------|-----|--------------------|--------|---|--------|---------------|-----------|--------------|-------------|
| A | 840  | 840  | 1 | G -> A | 618 | SNP (transition)   | 56.80% | 0 |        | RTX toxin CDS | RTX toxin | None         | KLI6996 8.1 |
| C | 986  | 986  | 1 | T -> C | 585 | SNP (transition)   | 48.00% | 0 | I -> T | RTX toxin CDS | RTX toxin | Substitution | KLI6996 8.1 |
| T | 1019 | 1019 | 1 | C -> T | 594 | SNP (transition)   | 49.30% | 0 | T -> M | RTX toxin CDS | RTX toxin | Substitution | KLI6996 8.1 |
| C | 1122 | 1122 | 1 | A -> C | 677 | SNP (transversion) | 47.30% | 0 |        | RTX toxin CDS | RTX toxin | None         | KLI6996 8.1 |
| A | 1159 | 1159 | 1 | G -> A | 678 | SNP (transition)   | 50.40% | 0 | A -> T | RTX toxin CDS | RTX toxin | Substitution | KLI6996 8.1 |
| G | 1191 | 1191 | 1 | A -> G | 646 | SNP (transition)   | 50.20% | 0 |        | RTX toxin CDS | RTX toxin | None         | KLI6996 8.1 |
| T | 1323 | 1323 | 1 | C -> T | 488 | SNP (transition)   | 54.10% | 0 |        | RTX toxin CDS | RTX toxin | None         | KLI6996 8.1 |
| C | 1353 | 1353 | 1 | T -> C | 459 | SNP (transition)   | 55.80% | 0 |        | RTX toxin CDS | RTX toxin | None         | KLI6996 8.1 |
| T | 1418 | 1418 | 1 | C -> T | 437 | SNP (transition)   | 39.10% | 0 | S -> L | RTX toxin CDS | RTX toxin | Substitution | KLI6996 8.1 |
| G | 1425 | 1425 | 1 | A -> G | 427 | SNP (transition)   | 37.90% | 0 |        | RTX toxin CDS | RTX toxin | None         | KLI6996 8.1 |

| Name  | Minimum | Maximum | Length | Change         | Coverage   | Polymorphism Type  | Variant Frequency |
|-------|---------|---------|--------|----------------|------------|--------------------|-------------------|
| ACAAA | 17      | 21      | 5      | GTTGT -> ACAAA | 106 -> 111 | Substitution       | 50.0% -> 51.8%    |
| T     | 22      | 22      | 1      | G -> T         | 99         | SNP (transversion) | 69.70%            |
| T     | 23      | 23      | 1      | G -> T         | 99         | SNP (transversion) | 47.50%            |
| TCA   | 25      | 27      | 3      | CGG -> TCA     | 90 -> 96   | Substitution       | 45.8% -> 46.7%    |
| C     | 28      | 28      | 1      | T -> C         | 88         | SNP (transition)   | 64.80%            |
| TA    | 29      | 30      | 2      | AT -> TA       | 87 -> 88   | Substitution       | 44.3% -> 44.8%    |
| AC    | 33      | 34      | 2      | TA -> AC       | 83         | Substitution       | 45.80%            |
| T     | 35      | 35      | 1      | A -> T         | 83         | SNP (transversion) | 66.30%            |
| T     | 36      | 36      | 1      | G -> T         | 76         | SNP (transversion) | 50.00%            |
| AG    | 37      | 38      | 2      | GA -> AG       | 69 -> 74   | Substitution       | 64.9% -> 68.1%    |
| T     | 39      | 39      | 1      | G -> T         | 67         | SNP (transversion) | 52.20%            |
| T     | 41      | 41      | 1      | A -> T         | 58         | SNP (transversion) | 65.50%            |
| T     | 44      | 44      | 1      | G -> T         | 57         | SNP (transversion) | 52.60%            |
| A     | 45      | 45      | 1      | T -> A         | 57         | SNP (transversion) | 64.90%            |
| T     | 47      | 47      | 1      | C -> T         | 44         | SNP (transition)   | 38.60%            |
| AT    | 48      | 49      | 2      | GA -> AT       | 36 -> 38   | Substitution       | 47.4% -> 50.0%    |

Contig 60

| Name | Minimum | Maximum | Length | Change | Coverage | Polymorphism Type | Variant Frequency |
|------|---------|---------|--------|--------|----------|-------------------|-------------------|
| C    | 98      | 98      | 1      | T -> C | 122      | SNP (transition)  | 43.40%            |

#### Contig 62

| Name | Minimum | Maximum | Length | Change   | Coverage | Polymorphism Type  | Variant Frequency |
|------|---------|---------|--------|----------|----------|--------------------|-------------------|
| CG   | 2723    | 2724    | 2      | TT -> CG | 30       | Substitution       | 96.70%            |
| T    | 2728    | 2728    | 1      | C -> T   | 29       | SNP (transition)   | 100.00%           |
| T    | 2744    | 2744    | 1      | A -> T   | 23       | SNP (transversion) | 100.00%           |
| A    | 2747    | 2747    | 1      | G -> A   | 22       | SNP (transition)   | 100.00%           |

#### Contig 63

| Name             | Minimum | Maximum | Length | Change                   | Coverage   | Polymorphism Type         | Variant Frequency | Variant P-Value (approximate) | Amino Acid Change | CDS                      | product              | Protein Effect | protein_id |
|------------------|---------|---------|--------|--------------------------|------------|---------------------------|-------------------|-------------------------------|-------------------|--------------------------|----------------------|----------------|------------|
| GCAACA<br>GCAACA | 89      | 88      | 0      | (AGCAAC)14 -> (AGCAAC)16 | 193 -> 199 | Insertion (tandem repeat) | 100.00%           | 0                             | Q -> QQQ<br>QQ    | hypothetical protein CDS | hypothetical protein | Insertion      | KLI69899.1 |
